# Supplementary material for: Global Genomic Epidemiology of Escherichia coli (ExPEC) ST38 Lineage Revealed a Virulome Associated with Human Infections
Source: Microorganisms. 2022 Dec 15;10(12):2482. doi: 10.3390/microorganisms10122482 (PMC9787326; doi:10.3390/microorganisms10122482)
Supplement: Supplementary file 1 [file microorganisms-10-02482-s001.zip]

Archive with 5 entries (5 files):
- HEATMAP ETT2 (Figure S2).pdf
- HEATMAP RESISTOMA COLORIDO E CIRCULAR (fIGURE S1).pdf
- PHYLOGENETIC TREE (MICRORGANISMS) Figure S3.png
- supplementary material legends.pdf
- Table S1 (Enterobase).xls
