# Supplementary material for: Global Genomic Epidemiology of Escherichia coli (ExPEC) ST38 Lineage Revealed a Virulome Associated with Human Infections
Source: Microorganisms. 2022 Dec 15;10(12):2482. doi: 10.3390/microorganisms10122482 (PMC9787326; doi:10.3390/microorganisms10122482)
Supplement: Supplementary file 1 [file microorganisms-10-02482-s001.zip › HEATMAP ETT2 (Figure S2).pdf]

Figure S2

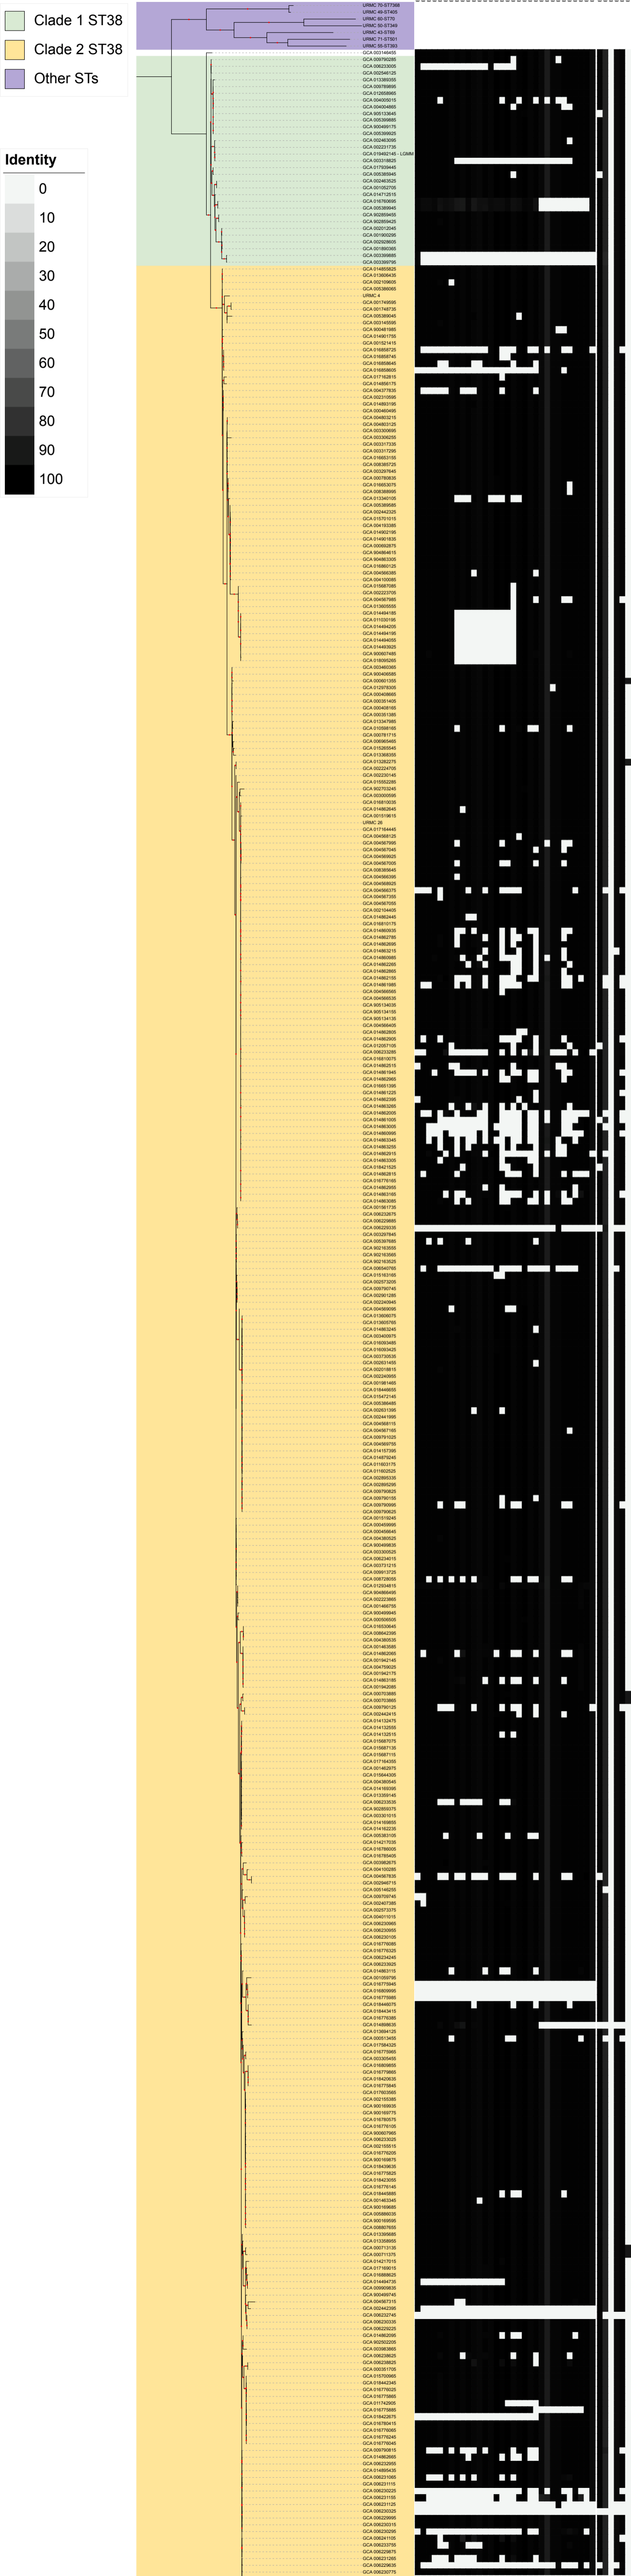

Identity

0

10

20

30

40

50

60

70

80

90

100

URMC 70-ST368

URMC 48-ST1405

URMC 60-ST170

URMC 50-ST349

URMC 43-ST89

URMC 71-ST501

URMC 55-ST393

GCA 00316855

GCA 00370268

GCA 00623305

GCA 002546125

GCA 013389355

GCA 009798955

GCA 012658955

GCA 004005015

GCA 004004865

GCA 905133645

GCA 005399885

GCA 900499175

GCA 005399925

GCA 002463095

GCA 002231735

GCA 019492145

GCA 003318825

GCA 017599445

GCA 005385945

GCA 002463525

GCA 001052705

GCA 014712515

GCA 016760945

GCA 005389945

GCA 902859455

GCA 902859425

GCA 002012045

GCA 001900295

GCA 002028805

GCA 001580365

GCA 003399885

GCA 003399795

GCA 014855825

GCA 019366135

GCA 002109605

GCA 005386065

URMC 4

GCA 001749595

GCA 001748735

GCA 005389945

GCA 003145595

GCA 900481895

GCA 014901755

GCA 001521415

GCA 016858925

GCA 016858745

GCA 016858645

GCA 016858605

GCA 017162815

GCA 014956175

GCA 900477835

GCA 002310595

GCA 014893195

GCA 000460495

GCA 004803215

GCA 004803125

GCA 003300695

GCA 003306255

GCA 003317335

GCA 003317295

GCA 016853185

GCA 008385725

GCA 003297645

GCA 000780835

GCA 016653075

GCA 008388995

GCA 013340105

GCA 005389585

GCA 002442325

GCA 015701015

GCA 004193385

GCA 014902195

GCA 014801835

GCA 000692875

GCA 904864615

GCA 004863305

GCA 016860125

GCA 004056385

GCA 004100085

GCA 015687085

GCA 002223705

GCA 004567985

GCA 013606955

GCA 014494195

GCA 011030195

GCA 014494205

GCA 014494195

GCA 014494055

GCA 014493925

GCA 900607485

GCA 018095265

GCA 003460365

GCA 900406585

GCA 900601355

GCA 012978305

GCA 000408665

GCA 000351405

GCA 000408165

GCA 000351385

GCA 013347985

GCA 010508165

GCA 000781715

GCA 000605465

GCA 015265545

GCA 013389355

GCA 013282275

GCA 002224705

GCA 002230145

GCA 015552285

GCA 902703245

GCA 003030995

GCA 016810035

GCA 014862645

GCA 001519615

URMC 26

GCA 017176445

GCA 004568125

GCA 004567995

GCA 004567045

GCA 004569925

GCA 004567005

GCA 008385545

GCA 004566395

GCA 004568925

GCA 004566375

GCA 004567355

GCA 004567055

GCA 002104405

GCA 014862445

GCA 016810175

GCA 014860935

GCA 014862785

GCA 014862895

GCA 014863215

GCA 014860985

GCA 014862265

GCA 014862965

GCA 014862155

GCA 014861985

GCA 004566565

GCA 004566535

GCA 905134035

GCA 905134155

GCA 905134135

GCA 004566405

GCA 014862805

GCA 014862005

GCA 012057105

GCA 000233385

GCA 016810075

GCA 014862515

GCA 014861945

GCA 014862965

GCA 016831395

GCA 014861225

GCA 014862395

GCA 014863265

GCA 014862005

GCA 014863345

GCA 014863255

GCA 014862915

GCA 014863305

GCA 018421525

GCA 014862815

GCA 016776165

GCA 014862955

GCA 014863165

GCA 014863285

GCA 001561735

GCA 006232675

GCA 006229685

GCA 006229335

GCA 000297945

GCA 005397685

GCA 902163555

GCA 902163565

GCA 902163525

GCA 006540765

GCA 015163165

GCA 002573205

GCA 009790745

GCA 002901285

GCA 002240945

GCA 004869995

GCA 013605075

GCA 013605765

GCA 014863245

GCA 003400975

GCA 016939485

GCA 016939425

GCA 003730535

GCA 002831455

GCA 002018815

GCA 002240955

GCA 001861485

GCA 015446655

GCA 015472145

GCA 005386485

GCA 002631395

GCA 002441995

GCA 004568115

GCA 004567165

GCA 009791025

GCA 004569755

GCA 014157395

GCA 014879345

GCA 011603175

GCA 011602525

GCA 002895335

GCA 002895295

GCA 009790825

GCA 009790155

GCA 009790995

GCA 009790625

GCA 001519245

GCA 000459995

GCA 000459945

GCA 004380525

GCA 900499835

GCA 003300525

GCA 006234015

GCA 003731215

GCA 009913725

GCA 008728055

GCA 012934815

GCA 904866495

GCA 002223865

GCA 001460755

GCA 900499945

GCA 000506505

GCA 016530645

GCA 008842395

GCA 004380535

GCA 001463585

GCA 014862065

GCA 001942145

GCA 004759025

GCA 001942175

GCA 014863185

GCA 001942085

GCA 000703885

GCA 000703865

GCA 009790125

GCA 000424815

GCA 014132475

GCA 014132555

GCA 014132515

GCA 015687075

GCA 015687135

GCA 016871115

GCA 017164355

GCA 001462975

GCA 015644305

GCA 004380545

GCA 014863995

GCA 013359145

GCA 006233535

GCA 902859375

GCA 003301015

GCA 014169855

GCA 014162235

GCA 005383105

GCA 014217035

GCA 016786005

GCA 016785405

GCA 003692875

GCA 004100285

GCA 004567835

GCA 002946715

GCA 005146255

GCA 009790745

GCA 000407385

GCA 002573375

GCA 004011015

GCA 006230965

GCA 006230955

GCA 006230105

GCA 016777685

GCA 016776325

GCA 006234245

GCA 006233925

GCA 014863115

GCA 001695975

GCA 016775945

GCA 016809995

GCA 016775985

GCA 018446075

GCA 016776385

GCA 014898635

GCA 013694125

GCA 000513455

GCA 017584325

GCA 016775965

GCA 003305455

GCA 016809855

GCA 016779865

GCA 018420635

GCA 016775945

GCA 017603965

GCA 002155385

GCA 900169935

GCA 900169975

GCA 016790575

GCA 016776105

GCA 900607965

GCA 006233025

GCA 002155515

GCA 016776205

GCA 900169875

GCA 015439635

GCA 018423055

GCA 016776145

GCA 015439585

GCA 001463585

GCA 900169985

GCA 005886035

GCA 900169995

GCA 008807655

GCA 013369885

GCA 013358955

GCA 000713135

GCA 000713175

GCA 014217015

GCA 017169015

GCA 016888625

GCA 014494735

GCA 009909835

GCA 900499745

GCA 004567315

GCA 000423995

GCA 005232745

GCA 006230335

GCA 006229225

GCA 014862095

GCA 902502205

GCA 003863865

GCA 006238625

GCA 006238825

GCA 000351705

GCA 015700965

GCA 018442345

GCA 016776025

GCA 016775865

GCA 011742905

GCA 016775885

GCA 006227615

GCA 016760815

GCA 016776065

GCA 016776245

GCA 016776045

GCA 009790815

GCA 014862865

GCA 005232955

GCA 014895435

GCA 006231065

GCA 006231115

GCA 006230225

GCA 006231155

GCA 006231125

GCA 006230325

GCA 006229995

GCA 006230315

GCA 006230395

GCA 006241105

GCA 006233755

GCA 006229875

GCA 006231265

GCA 006229695

GCA 006230775

GCA 006233745

GCA 006231335

EC042\_3044

EC042\_3045

EC042\_3046

EC042\_3047

EC042\_3048

EC042\_3049

EC042\_3050

EC042\_3051

EC042\_3052

EC042\_3053

EC042\_3054

EC042\_3055

EC042\_3056

EC042\_3057

EC042\_3058

EC042\_3059

EC042\_3060

EC042\_3061

EC042\_3062

EC042\_3063

EC042\_3064

EC042\_3065

EC042\_3066

EC042\_3067

EC042\_3068

EC042\_3069

EC042\_3070

EC042\_3071

EC042\_3072

EC042\_3073

EC042\_3074

EC042\_3075

EC042\_3076

EC042\_3077

EC042\_3078

EC042\_3079

EC042\_3080

EC042\_3081

EC042\_3082

EC042\_3083

EC042\_3084

EC042\_3085

EC042\_3086

EC042\_3087

EC042\_3088

EC042\_3089

EC042\_3090

EC042\_3091

EC042\_3092

EC042\_3093

EC042\_3094

EC042\_3095

EC042\_3096

EC042\_3097

EC042\_3098

EC042\_3099

EC042\_3100

EC042\_3101

EC042\_3102

EC042\_3103

EC042\_3104

EC042\_3105

EC042\_3106

EC042\_3107

EC042\_3108

EC042\_3109

EC042\_3110

EC042\_3111

EC042\_3112

EC042\_3113

EC042\_3114

EC042\_3115

EC042\_3116

EC042\_3117

EC042\_3118

EC042\_3119

EC042\_3120

EC042\_3121

EC042\_3122

EC042\_3123

EC042\_3124

EC042\_3125

EC042\_3126

EC042\_3127

EC042\_3128

EC042\_3129

EC042\_3130

EC042\_3131

EC042\_3132

EC042\_3133

EC042\_3134

EC042\_3135

EC042\_3136

EC042\_3137

EC042\_3138

EC042\_3139

EC042\_3140

EC042\_3141

EC042\_3142

EC042\_3143

EC042\_3144

EC042\_3145

EC042\_3146

EC042\_3147

EC042\_3148

EC042\_3149

EC042\_3150

EC042\_3151

EC042\_3152

EC042\_3153

EC042\_3154

EC042\_3155

EC042\_3156

EC042\_3157

EC042\_3158

EC042\_3159

EC042\_3160

EC042\_3161

EC042\_3162

EC042\_3163

EC042\_3164

EC042\_3165

EC042\_3166

EC042\_3167

EC042\_3168

EC042\_3169

EC042\_3170

EC042\_3171

EC042\_3172

EC042\_3173

EC042\_3174

EC042\_3175

EC042\_3176

EC042\_3177

EC042\_3178

EC042\_3179

EC042\_3180

EC042\_3181

EC042\_3182

EC042\_3183

EC042\_3184

EC042\_3185

EC042\_3186

EC042\_3187

EC042\_3188

EC042\_3189

EC042\_3190

EC042\_3191

EC042\_3192

EC042\_3193

EC042\_3194

EC042\_3195

EC042\_3196

EC042\_3197

EC042\_3198

EC042\_3199

EC042\_3200

EC042\_3201

EC042\_3202

EC042\_3203

EC042\_3204

EC042\_3205

EC042\_3206

EC042\_3207

EC042\_3208

EC042\_3209

EC042\_3210

EC042\_3211

EC042\_3212

EC042\_3213

EC042\_3214

EC042\_3215

EC042\_3216

EC042\_3217

EC042\_3218

EC042\_3219

EC042\_3220

EC042\_3221

EC042\_3222

EC042\_3223

EC042\_3224

EC042\_3225

EC042\_3226

EC042\_3227

EC042\_3228

EC042\_3229

EC042\_3230

EC042\_3231

EC042\_3232

EC042\_3233

EC042\_3234

EC042\_3235

EC042\_3236

EC042\_3237

EC042\_3238

EC042\_3239

EC042\_3240

EC042\_3241

EC042\_3242

EC042\_3243

EC042\_3244

EC042\_3245

EC042\_3246

EC042\_3247

EC042\_3248

EC042\_3249

EC042\_3250

EC042\_3251

EC042\_3252

EC042\_3253

EC042\_3254

EC042\_3255

EC042\_3256

EC042\_3257

EC042\_3258

EC042\_3259

EC042\_3260

EC042\_3261

EC042\_3262

EC042\_3263

EC042\_3264

EC042\_3265

EC042\_3266

EC042\_3267

EC042\_3268

EC042\_3269

EC042\_3270

EC042\_3271

EC042\_3272

EC042\_3273

EC042\_3274

EC042\_3275

EC042\_3276

EC042\_3277

EC042\_3278

EC042\_3279

EC042\_3280

EC042\_3281

EC042\_3282

EC042\_3283

EC042\_3284

EC042\_3285

EC042\_3286

EC042\_3287

EC042\_3288

EC042\_3289

EC042\_3290

EC042\_3291

EC042\_3292

EC042\_3293

EC042\_3294

EC042\_3295

EC042\_3296

EC042\_3297

EC042\_3298

EC042\_3299

EC042\_3300

EC042\_3301

EC042\_3302

EC042\_3303

EC042\_3304

EC042\_3305

EC042\_3306

EC042\_3307

EC042\_3308

EC042\_3309

EC042\_3310

EC042\_3311

EC042\_3312

EC042\_3313

EC042\_3314

EC042\_3315

EC042\_3316

EC042\_3317

EC042\_3318

EC042\_3319

EC042\_3320

EC042\_3321

EC042\_3322

EC042\_3323

EC042\_3324

EC042\_3325

EC042\_3326

EC042\_3327

EC042\_3328

EC042\_3329

EC042\_3330

EC042\_3331

EC042\_3332

EC042\_3333

EC042\_3334

EC042\_3335

EC042\_3336

EC042\_3337

EC042\_3338

EC042\_3339

EC042\_3340

EC042\_3341

EC042\_3342

EC042\_3343

EC042\_3344

EC042\_3345

EC042\_3346

EC042\_3347

EC042\_3348

EC042\_3349

EC042\_3350

EC042\_3351

EC042\_3352

EC042\_3353

EC042\_3354

EC042\_3355

EC042\_3356

EC042\_3357

EC042\_3358

EC042\_3359

EC042\_3360

EC042\_3361

EC042\_3362

EC042\_3363

EC042\_3364

EC042\_3365

EC042\_3366

EC042\_3367

EC042\_3368

EC042\_3369

EC042\_3370

EC042\_3371

EC042\_3372

EC042\_3373

EC042\_3374

EC042\_3375

EC042\_3376

EC042\_3377

EC042\_3378

EC042\_3379

EC042\_3380

EC042\_3381

EC042\_3382

EC042\_3383

EC042\_3384

EC042\_3385

EC042\_3386

EC042\_3387

EC042\_3388

EC042\_3389

EC042\_3390

EC042\_3391

EC042\_3392

EC042\_3393

EC042\_3394

EC042\_3395

EC042\_3396

EC042\_3397

EC042\_3398

EC042\_3399

EC042\_3400

EC042\_3401

EC042\_3402

EC042\_3403

EC042\_3404

EC042\_3405

EC042\_3406

EC042\_3407

EC042\_3408

EC042\_3409

EC042\_3410

EC042\_3411

EC042\_3412

EC042\_3413

EC042\_3414

EC042\_3415

EC042\_3416

EC042\_3417

EC042\_3418

EC042\_3419

EC042\_3420

EC042\_3421

EC042\_3422

EC042\_3423

EC042\_3424

EC042\_3425

EC042\_3426

EC042\_3427

EC042\_3428

EC042\_3429

EC042\_3430

EC042\_3431

EC042\_3432

EC042\_3433

EC042\_3434

EC042\_3435

EC042\_3436

EC042\_3437

EC042\_3438

EC042\_3439

EC042\_3440

EC042\_3441

EC042\_3442

EC042\_3443

EC042\_3444

EC042\_3445

EC042\_3446

EC042\_3447

EC042\_3448

EC042\_3449

EC042\_3450

EC042\_3451

EC042\_3452

EC042\_3453

EC042\_3454

EC042\_3455

EC042\_3456

EC042\_3457

EC042\_3458

EC042\_3459

EC042\_3460

EC042\_3461

EC042\_3462

EC042\_3463

EC042\_3464

EC042\_3465

EC042\_3466

EC042\_3467

EC042\_3468

EC042\_3469

EC042\_3470

EC042\_3471

EC042\_3472

EC042\_3473

EC042\_3474

EC042\_3475

EC042\_3476

EC042\_3477

EC042\_3478

EC042\_3479

EC042\_3480

EC042\_3481

EC042\_3482

EC042\_3483</
