# Supplementary material for: Global Genomic Epidemiology of Escherichia coli (ExPEC) ST38 Lineage Revealed a Virulome Associated with Human Infections
Source: Microorganisms. 2022 Dec 15;10(12):2482. doi: 10.3390/microorganisms10122482 (PMC9787326; doi:10.3390/microorganisms10122482)
Supplement: Supplementary file 1 [file microorganisms-10-02482-s001.zip › Table S1 (Enterobase).xls]

## Sheet: 21
Table S1: Metadata of E. coli ST38 isolates/genomes from Enterobase
Uberstrain	Name	Source Details	Collection Year	Country	Path/Nonpath	Simple Patho
ESC_AA0768AA	GR124	Human	2008	Brazil	Pathogen	UPEC
ESC_AA0769AA	St5679		2001	Germany
ESC_AA0770AA	7060	Human	2007	Bangladesh	Pathogen	EAEC
ESC_AA0771AA	DSM 10958				Non pathogen
ESC_AA0772AA	601225	Human	2007	Bangladesh	Non pathogen	EAEC
ESC_AA0773AA	B025	Malurus cyaneus	2000	Australia	Non Pathogen
ESC_AA0774AA	Ec4HSC2013	Human	2013	Ecuador
ESC_AA0775AA	IAL45	Human	2004	Brazil	Pathogen
ESC_AA0776AA	7002	Human	2007	Bangladesh	Non pathogen	EAEC
ESC_AA0777AA	HMMC063a	Human	2005	Brazil	Pathogen	UPEC
ESC_AA0778AA	IMT13220	Chicken	2007	Germany	Pathogen	APEC
ESC_AA0779AA	HMMC191	Human	2005	Brazil	Pathogen	UPEC
ESC_AA0780AA	GR99	Human	2008	Brazil	Pathogen	UPEC
ESC_AA0781AA	HMMC159	Human	2005	Brazil	Pathogen	UPEC
ESC_AA0782AA	IMT13920	Turkey	2007	Germany	Pathogen	APEC
ESC_AA0783AA	UTI229	Human	2008	United Kingdom	Pathogen	UPEC
ESC_AA0784AA	IMT13918	Turkey	2007	Germany	Pathogen	APEC
ESC_AA0785AA	UTI460	Human	2009	United Kingdom	Pathogen	UPEC
ESC_AA0786AA	H132760800	Human	2013	United Kingdom	Pathogen	EAEC
ESC_AA0787AA	UTI456	Human	2009	United Kingdom	Pathogen	UPEC
ESC_AA0788AA	X70	Human		Switzerland	Pathogen
ESC_AA0789AA	UTI365	Human	2009	United Kingdom	Pathogen	UPEC
ESC_AA0790AA	900033	Human	2007	Bangladesh	Pathogen	EAEC
ESC_AA0791AA	NDM-1Dok01	Human	2010	Japan	Pathogen	NDM-1
ESC_AA0792AA	601070	Human	2007	Bangladesh	Pathogen	EAEC
ESC_AA0793AA	SCRI_5008	Barley	2008	United Kingdom
ESC_AA0794AA	VB 962882	Dog	2010	Denmark	Pathogen	ExPEC
ESC_AA0795AA	MS22	Human	2007	Canada	Pathogen	ESBL CTX-M-15
ESC_AA0796AA	900002	Human	2007	Bangladesh	Pathogen	EAEC
ESC_AA0797AA	RG08	Human	2007	Canada	Pathogen	ESBL CTX-M-15
ESC_AA0798AA	Meng352	Human	2004	Brazil	Pathogen	ExPEC
ESC_AA0799AA	56-01	Human	2001	Canada	Pathogen	ESBL CTX-M-14
ESC_AA0800AA	SR148	Human		Brazil	Pathogen	UPEC
ESC_AA0801AA	G75a	Human	1995	Nigeria	Pathogen	EAEC
ESC_AA0802AA	PC PMQR169	Human	2008	France	nonpathogen
ESC_AA0803AA	123-02	Human	2002	Canada	Pathogen	ESBL CTX-M-14
ESC_AA0804AA	E460		2002	Germany
ESC_AA0805AA	G23	Human	1995	Nigeria	Pathogen	EAEC
ESC_AA0806AA	IMT15192	Turkey	2008	Germany	Pathogen	APEC
ESC_AA0807AA	G29	Human	1995	Nigeria	Pathogen	EAEC
ESC_AA0808AA	24.2-S3	Human	2012	Australia
ESC_AA0809AA	IMT2111	Chicken	1999	Germany	Pathogen	APEC
ESC_AA0810AA	SR200	Human		Brazil	Pathogen	UPEC
ESC_AA0811AA	ROAR359	Human		France	Pathogen
ESC_AA0812AA	900516	Human	2007	Bangladesh	Pathogen	EAEC
ESC_AA0813AA	E10084	Human	2001	Germany
ESC_AA0814AA	601264	Human	2007	Bangladesh	Pathogen	EAEC
ESC_AA0815AA	KS 10/1	Pigeon	2000	Germany	Pathogen
ESC_AA0816AA	IMT2314	Human			Pathogen	UPEC
ESC_AA0817AA	E424		2002	Germany
ESC_AA0818AA	900745	Human	2007	Bangladesh	Pathogen	EAEC
ESC_AA0819AA	GR109	Human	2008	Brazil	Pathogen	UPEC
ESC_AA0820AA	601108	Human	2007	Bangladesh	Non pathogen	EAEC
ESC_AA0821AA	669	Human	2008	United Kingdom	Pathogen	EAEC
ESC_AA0822AA	7016	Human	2007	Bangladesh	Non pathogen	EAEC
ESC_AA0823AA	601182	Human	2007	Bangladesh	Non pathogen	EAEC
ESC_AA0824AA	D120	Human		Brazil	Pathogen	UPEC
ESC_AA0825AA	Ec14HSC2013	Sea Lion	2013	Ecuador
ESC_AA0826AA	GR334	Human	2008	Brazil	Pathogen	UPEC
ESC_AA0827AA	PC 250111-08A	Water	2011	France
ESC_AA0828AA	GR7	Human	2008	Brazil	Pathogen	UPEC
ESC_AA0829AA	601000	Human	2007	Bangladesh	Non pathogen	EAEC
ESC_AA0830AA	1975	Human	2008	United Kingdom	Pathogen	EAEC
ESC_AA0831AA	Ecoli-CHU-5	Human	2011	France	nonpathogen
ESC_AA0832AA	Ecoli-CHU-11	Human	2011	France	nonpathogen	ESBL CTX-M-14
ESC_AA0833AA	900252	Human	2007	Bangladesh	Pathogen	EAEC
ESC_AA0834AA	601029	Human	2007	Bangladesh	Pathogen	EAEC
ESC_BA1075AA	DRS019487			Japan
ESC_BA2280AA	GENOSCREEN_SAMPLE_5123
ESC_BA2282AA	GENOSCREEN_SAMPLE_5114
ESC_BA3401AA	992_ECOL	Homo sapiens		United States
ESC_BA3555AA	105_ECOL	Homo sapiens		United States
ESC_BA4142AA	1204-sc-1872581
ESC_BA4402AA	DRS000654
ESC_BA5132AA	upec-221	Homo sapiens; patient with urinary tract infection	2011	United States
ESC_BA5230AA	upec-133	Homo sapiens; patient with urinary tract infection	2011	United States
ESC_BA5337AA	blood-10-180	Homo sapiens; blood from patient with bacteremia	2010	United States
ESC_BA5385AA	blood-10-0183	Homo sapiens; blood from patient with bacteremia	2010	United States
ESC_BA5875AA	eo3701
ESC_BA5961AA	eo3045
ESC_BA6038AA	eo2758
ESC_BA6055AA	eo962
ESC_BA6114AA	eo3620
ESC_BA6191AA	eo457
ESC_BA6256AA	eo2118
ESC_BA6307AA	eo3352
ESC_BA6422AA	eo3315	blood; Homo sapiens
ESC_BA6427AA	eo2575	blood; Homo sapiens
ESC_BA6437AA	eo1856	blood; Homo sapiens
ESC_BA6456AA	eo662	blood; Homo sapiens
ESC_BA6613AA	ECO0331	blood; Homo sapiens
ESC_BA6619AA	eo3542	blood; Homo sapiens
ESC_BA6629AA	ECO0389	blood; Homo sapiens
ESC_BA6657AA	eo960	blood; Homo sapiens
ESC_BA6722AA	eo2380	blood; Homo sapiens
ESC_BA6741AA	ECO0355	blood; Homo sapiens
ESC_BA6774AA	ECO0198	blood; Homo sapiens
ESC_BA6810AA	eo821	blood; Homo sapiens
ESC_BA6901AA	eo573	blood; Homo sapiens
ESC_BA6902AA	eo478	blood; Homo sapiens
ESC_BA6944AA	ECO0226	blood; Homo sapiens
ESC_BA6981AA	ECO0341	blood; Homo sapiens
ESC_BA6983AA	ECO0323	blood; Homo sapiens
ESC_BA7052AA	eo1419	blood; Homo sapiens
ESC_BA7087AA	eo3313	blood; Homo sapiens
ESC_BA7113AA	eo2071	blood; Homo sapiens
ESC_BA7155AA	eo580	blood; Homo sapiens
ESC_BA7171AA	eo2151	blood; Homo sapiens
ESC_BA7221AA	eo2973	blood; Homo sapiens
ESC_BA7336AA	eo448	blood; Homo sapiens
ESC_BA7342AA	ECO0285	blood; Homo sapiens
ESC_BA7397AA	eo477	blood; Homo sapiens
ESC_BA7674AA	eo1208	blood; Homo sapiens
ESC_BA8229AA	AZ-TG73283	chicken; skinless boneless chicken breast	2013	United States
ESC_BA8382AA	UCI 65	urine; Homo sapiens	2013	United States
ESC_BA8402AA	6-175-07_S1_C3	stool; Homo sapiens	2009	Tanzania
ESC_BA8464AA	1-392-07_S1_C2	stool; Homo sapiens	2009	Tanzania
ESC_BA8508AA	1-110-08_S4_C1	stool; Homo sapiens	2009	Tanzania
ESC_BA8523AA	6-175-07_S1_C2	stool; Homo sapiens	2009	Tanzania
ESC_BA8600AA	1-392-07_S1_C1	stool; Homo sapiens	2009	Tanzania
ESC_BA9199AA	UMEA 3163-1	urine; Homo sapiens	1997	Sweden
ESC_BA9226AA	UMEA 3033-1	urine; Homo sapiens	1995	Sweden
ESC_BA9380AA	HVH 41 (4-2677849)	blood; Homo sapiens	2003	Denmark
ESC_BA9574AA	Escherichia coli 19115
ESC_CA0513AA	E 1641	feces; Homo sapiens
ESC_CA1086AA	24832
ESC_CA1345AA	KTE199	female; Homo sapiens	2010
ESC_CA1359AA	KTE237	female; Homo sapiens	2010
ESC_CA1362AA	KTE236	female; Homo sapiens	2010
ESC_CA1389AA	KTE76	female; Homo sapiens	2010	Denmark
ESC_CA1431AA	KTE121	female; Homo sapiens	2010	Denmark
ESC_CA2983AA	JEONG-9852	cow; Bos taurus; fecal beef heifer	2015	United States
ESC_CA2986AA	JEONG-9851	cow; Bos taurus; fecal beef heifer	2015	United States
ESC_CA2987AA	JEONG-9850	cow; Bos taurus; fecal beef heifer	2015	United States
ESC_CA2988AA	JEONG-9849	cow; Bos taurus; fecal beef heifer	2015	United States
ESC_CA2989AA	JEONG-9848	cow; Bos taurus; fecal beef heifer	2015	United States
ESC_CA2990AA	JEONG-9847	cow; Bos taurus; fecal beef heifer	2015	United States
ESC_CA3802AA	AA068	Hu Child; feces	2009	Mali
ESC_CA3805AA	AA065	Hu Child	2009	Mali
ESC_CA3819AA	AA051		2012	Denmark
ESC_CA3897AA	13	Human	2013	Brazil	Pathogen	UPEC
ESC_CA4702AA	VREC0593	feces; Meleagris gallopavo
ESC_CA4852AA	0000-0053-7518	Homo sapiens; Age: 88; female; urine	2015	United States
ESC_CA5100AA	EuSCAPE_SE002
ESC_CA5273AA	PB305	urine; Homo sapiens
ESC_CA5299AA	W2-10-ERB6
ESC_CA5300AA	W2-10-ERB4
ESC_CA5301AA	W2-10-ERB1	Canal; Environmental
ESC_CA5365AA	PB308	blood; Homo sapiens
ESC_CA5384AA	PB134	blood; Homo sapiens
ESC_CA5394AA	PB33	urine; Homo sapiens
ESC_CA5424AA	PB212	urine; Homo sapiens
ESC_CA5449AA	EuSCAPE_LT001
ESC_CA5466AA	EuSCAPE_DE068
ESC_CA5656AA	DO14
ESC_CA5775AA	EuSCAPE_ES038
ESC_CA6878AA	AZ-TG-WWTP-INF-5	environmental-water; untreated waste water	2015	United States
ESC_CA6942AA	ST38_23
ESC_CA6943AA	ST38_22
ESC_CA6944AA	ST38_21
ESC_CA6945AA	ST38_20
ESC_CA6946AA	ST38_19
ESC_CA6947AA	ST38_18
ESC_CA6948AA	ST38_17
ESC_CA6949AA	ST38_16
ESC_CA6950AA	ST38_15
ESC_CA6951AA	ST38_14
ESC_CA6952AA	ST38_13
ESC_CA6953AA	ST38_12
ESC_CA6954AA	ST38_11
ESC_CA6955AA	ST38_10
ESC_CA6956AA	ST38_9
ESC_CA6957AA	ST38_8
ESC_CA6958AA	ST38_7
ESC_CA6959AA	ST38_6
ESC_CA6960AA	ST38_5
ESC_CA6961AA	ST38_4
ESC_CA6962AA	ST38_3
ESC_CA6963AA	ST38_2
ESC_CA6964AA	ST38_1
ESC_CA9262AA	VREC0464
ESC_CA9283AA	VREC0319
ESC_CA9387AA	VREC0082
ESC_CA9434AA	VRES0094
ESC_CA9440AA	VRES0058
ESC_CA9453AA	VRES0004
ESC_CA9457AA	VRES0015
ESC_CA9463AA	VRES0282
ESC_CA9471AA	VRES0265
ESC_CA9479AA	VRES0222
ESC_CA9481AA	VRES0129
ESC_CA9500AA	VRES0213
ESC_CA9523AA	VRES0125
ESC_CA9538AA	VRES0242
ESC_CA9545AA	VRES0099
ESC_CA9555AA	VREC0266
ESC_CA9568AA	VRES0249
ESC_CA9582AA	VRES0364
ESC_DA0906AA	KKa021			Japan
ESC_DA0956AA	EuSCAPE_UK130
ESC_DA1033AA	MOD1-EC6257	bone marrow; Meleagris; Turkey	1986	United States
ESC_DA1451AA	EuSCAPE_UK039
ESC_DA1454AA	EuSCAPE_UK033
ESC_DA1457AA	EuSCAPE_UK021
ESC_DA1465AA	EuSCAPE_UK004
ESC_DA2230AA	RA228
ESC_DA2233AA	RA195
ESC_DA2235AA	RA176
ESC_DA2242AA	RA102
ESC_DA2245AA	RA061
ESC_DA2350AA	195744	Homo sapiens; human	2015	United Kingdom
ESC_DA2363AA	EuSCAPE_UK015
ESC_DA2412AA	203373	Homo sapiens; human	2016	United Kingdom
ESC_DA2570AA	206710	Homo sapiens; human	2016	United Kingdom
ESC_DA3383AA	50760471	Blood	2013	Norway
ESC_DA3391AA	50640492	Urine	2012	Norway
ESC_DA3468AA	MSDJ10141		2012	France
ESC_DA3469AA	MSDJ10045		2012	France
ESC_DA3470AA	MSDJ10074		2013	France
ESC_DA4359AA	PA9B
ESC_DA4635AA	B107	Human Clinical Bacteriemia	2012	United Kingdom
ESC_DA4749AA	GN04306	Homo sapiens	2011	United States
ESC_DA4851AA	GN02277	Homo sapiens; bodily fluid	2004	United States
ESC_DA5226AA	HICF657
ESC_DA5232AA	HICF647
ESC_DA5234AA	HICF642
ESC_DA5235AA	HICF641
ESC_DA5238AA	HICF621
ESC_DA5239AA	HICF618
ESC_DA5250AA	HICF570
ESC_DA5251AA	HICF560
ESC_DA5256AA	HICF539
ESC_DA5285AA	HICF255	Homo sapiens; blood	2011	United Kingdom
ESC_DA5295AA	HICF243	Homo sapiens; blood	2011	United Kingdom
ESC_DA5319AA	HICF209	Homo sapiens; blood	2011	United Kingdom
ESC_DA5372AA	HICF137	Homo sapiens; blood	2010	United Kingdom
ESC_DA6525AA	50739467	Homo sapiens; urine	2013	Norway
ESC_DA6649AA	SAMPLE_WTCHG_207707_211
ESC_DA7029AA	MSB1_3B-sc-2280406
ESC_DA7031AA	MSB1_7A-sc-2280394
ESC_DA7087AA	MSB1_2I-sc-2280409
ESC_DA7108AA	MSB1_6C-sc-2280315
ESC_DA7603AA	VRES0387
ESC_DA7612AA	gha300521-sc-2235533
ESC_DA7747AA	A48349-sc-2212422
ESC_DA7808AA	E18_Ck-sc-2273677
ESC_DA7844AA	C12359-sc-2212406
ESC_DA7913AA	NHES1184
ESC_DA7968AA	NHES0187
ESC_DA7993AA	NHEC0114
ESC_DA8008AA	NHES0225
ESC_DA8057AA	NHES0329
ESC_DA8064AA	NHES0312
ESC_DA8072AA	NHES0296
ESC_DA8077AA	NHES0285
ESC_DA8085AA	NHES0264
ESC_DA8116AA	NHES0193
ESC_DA8262AA	NHES0239
ESC_DA8337AA	NHES0252
ESC_DA8346AA	NHES0207
ESC_DA8359AA	NHES0339
ESC_DA8360AA	NHES0164
ESC_DA8986AA	BCW_3339	culture
ESC_DA9013AA	BCW_3266	culture
ESC_DA9310AA	PH93	de-identified patient sample	2012	Pakistan
ESC_DA9582AA	222_13	Homo sapiens; feces	2014	United Kingdom
ESC_DA9603AA	C00009213
ESC_DA9627AA	C00009180
ESC_DA9628AA	C00009179
ESC_DA9629AA	C00009178
ESC_DA9651AA	C00009150
ESC_DA9653AA	C00009147
ESC_DA9654AA	C00009146
ESC_DA9655AA	C00009145
ESC_DA9660AA	C00009136
ESC_DA9662AA	C00009133
ESC_DA9664AA	C00009131
ESC_EA0186AA	115
ESC_EA0190AA	111
ESC_EA1333AA	a7b69e10-d0d6-11e5-bc69-3c4a9275d6c6
ESC_EA1422AA	EuSCAPE_NO007
ESC_EA1431AA	EuSCAPE_TR247
ESC_EA1433AA	EuSCAPE_TR226
ESC_EA1452AA	EuSCAPE_TR039
ESC_EA1578AA	Ec_127_15			Portugal
ESC_EA1581AA	Ec_344_14			Portugal
ESC_EA1611AA	PNUSAE002971	Age: 20-29; stool		United States
ESC_EA1858AA	KKa019	river		Japan
ESC_EA1868AA	KOr021	river		Japan
ESC_EA3089AA	MOD1-EC5182	environmental-water; water	1993	United States
ESC_EA3544AA	DHQP1400453	Homo sapiens; urine	2013	United States
ESC_EA3684AA	b1ae5bd0-dfca-11e5-88b1-3c4a9275d6c6
ESC_EA3694AA	b0fe1ea0-dfca-11e5-88b1-3c4a9275d6c6
ESC_EA3767AA	2944		2015	Germany
ESC_EA3780AA	2849		2015	Germany
ESC_EA3794AA	2756		2015	Germany
ESC_EA3805AA	2629		2015	Germany
ESC_EA3806AA	2622		2015	Germany
ESC_EA3815AA	2586		2014	Germany
ESC_EA3819AA	2555		2014	Germany
ESC_EA3866AA	1394		2014	Germany
ESC_EA3938AA	619	Homo sapiens	2013	Germany
ESC_EA4471AA	91dcc260-dfca-11e5-88b1-3c4a9275d6c6
ESC_EA5049AA	MOD1-EC3611	veterinary clinical/research| chicken; feces young chicken (Gallus gallus domesticus)	2014	United States
ESC_EA6027AA	KCJK2329	veterinary clinical/research| cow; Bos taurus; feces (Bos taurus)	2016	United States
ESC_EA6162AA	234	Groin swab	2015	Oman
ESC_EA6165AA	347	Wound	2015	Oman
ESC_EA6166AA	481	Rectal swab	2015	Oman
ESC_EA6183AA	1433	UMBILICAL ISOLATES	2015	Oman
ESC_EA6259AA	MOD1-EC3518	veterinary clinical/research| dairy| other animal; dairy cow feces (Bos taurus)	2014	United States
ESC_EA6374AA	ERS1032649
ESC_EA6385AA	ERS1032638
ESC_EA6575AA	1939df60-fa7c-11e5-aecb-3c4a9275d6c8
ESC_EA6576AA	18f890a0-fa7c-11e5-aecb-3c4a9275d6c8
ESC_EA6640AA	24de3820-fa7c-11e5-ae86-3c4a9275d6c8
ESC_EA6641AA	2491c5d0-fa7c-11e5-ae86-3c4a9275d6c8
ESC_EA6642AA	244d42c0-fa7c-11e5-ae86-3c4a9275d6c8
ESC_EA6643AA	23fe5f70-fa7c-11e5-ae86-3c4a9275d6c8
ESC_EA6873AA	8a4aba30-fa7c-11e5-ae86-3c4a9275d6c8
ESC_EA6874AA	8a0b4030-fa7c-11e5-ae86-3c4a9275d6c8
ESC_EA6875AA	89c891e0-fa7c-11e5-ae86-3c4a9275d6c8
ESC_EA6876AA	897f53e0-fa7c-11e5-ae86-3c4a9275d6c8
ESC_EA6877AA	8921f1a0-fa7c-11e5-ae86-3c4a9275d6c8
ESC_EA6979AA	83d2d7f0-fa7c-11e5-9ab9-3c4a9275d6c8
ESC_EA7407AA	6ab34390-fa7c-11e5-aecb-3c4a9275d6c8
ESC_EA7627AA	34972ec0-fa7c-11e5-850b-3c4a9275d6c8
ESC_EA7629AA	33e989a0-fa7c-11e5-850b-3c4a9275d6c8
ESC_EA7652AA	2b3a7c10-fa7c-11e5-850b-3c4a9275d6c8
ESC_EA7689AA	1c312660-fa7c-11e5-850b-3c4a9275d6c8
ESC_EA7717AA	2c176e90-fa7c-11e5-b5da-3c4a9275d6c8
ESC_EA7772AA	21495190-fa7c-11e5-9ab9-3c4a9275d6c8
ESC_EA7812AA	5bfbb760-fa7c-11e5-bdd4-3c4a9275d6c8
ESC_EA8090AA	22cb5db0-fa7c-11e5-a546-3c4a9275d6c8
ESC_EA8092AA	2233b190-fa7c-11e5-a546-3c4a9275d6c8
ESC_EA8235AA	1e37cbd0-fa7c-11e5-a43c-3c4a9275d6c8
ESC_EA8244AA	1bc78f20-fa7c-11e5-a43c-3c4a9275d6c8
ESC_EA8245AA	1b7d66c0-fa7c-11e5-a43c-3c4a9275d6c8
ESC_EA8254AA	18718650-fa7c-11e5-a43c-3c4a9275d6c8
ESC_EA8257AA	17788050-fa7c-11e5-a43c-3c4a9275d6c8
ESC_EA8258AA	171bba50-fa7c-11e5-a43c-3c4a9275d6c8
ESC_EA8268AA	1bfd1e10-fa7c-11e5-a546-3c4a9275d6c8
ESC_EA8269AA	1ba0a630-fa7c-11e5-a546-3c4a9275d6c8
ESC_EA8716AA	0000-0060-5860	Homo sapiens; Age: 85; female; urine	2016	United States
ESC_EA8849AA	14060900		2014	Italy
ESC_EA8897AA	SCP28-55	Homo sapiens		Netherlands
ESC_EA8904AA	SCP28-28	Homo sapiens		Netherlands
ESC_EA8932AA	SCK68-02	Homo sapiens		Netherlands
ESC_EA8937AA	SCK67-76	Homo sapiens		Netherlands
ESC_EA8972AA	SCK67-37	Homo sapiens		Netherlands
ESC_EA8976AA	SCP24-80	Homo sapiens		Netherlands
ESC_EA9061AA	SCP22-33	Homo sapiens		Netherlands
ESC_EA9076AA	SCK52-53	Homo sapiens		Netherlands
ESC_EA9081AA	SCP22-05	Homo sapiens		Netherlands
ESC_EA9117AA	SCK52-09	Homo sapiens		Netherlands
ESC_EA9121AA	SCK52-04	Homo sapiens		Netherlands
ESC_EA9158AA	SCP18-62	Homo sapiens		Netherlands
ESC_EA9204AA	SCK46-44	Homo sapiens		Netherlands
ESC_EA9211AA	SCK46-38	Homo sapiens		Netherlands
ESC_EA9215AA	SCP15-14	Homo sapiens		Netherlands
ESC_EA9217AA	SCP15-13	Homo sapiens		Netherlands
ESC_EA9292AA	SCK32-60	Homo sapiens		Netherlands
ESC_EA9298AA	SCK32-48	Homo sapiens		Netherlands
ESC_EA9359AA	SCK28-74	Homo sapiens		Netherlands
ESC_EA9410AA	SCK16-72	Homo sapiens		Netherlands
ESC_EA9427AA	SCP04-75	Homo sapiens		Netherlands
ESC_EA9439AA	SCP04-11	Homo sapiens		Netherlands
ESC_EA9454AA	SCK04-71	Homo sapiens		Netherlands
ESC_EA9464AA	SCK03-23	Homo sapiens		Netherlands
ESC_EA9473AA	SCP02-14	Homo sapiens		Netherlands
ESC_EA9474AA	SCP02-13	Homo sapiens		Netherlands
ESC_EA9475AA	SCP01-25	Homo sapiens		Netherlands
ESC_EA9501AA	SCP28-14-2	Homo sapiens		Netherlands
ESC_EA9503AA	SCP27-70	Homo sapiens		Netherlands
ESC_EA9547AA	SCP22-61	Homo sapiens		Netherlands
ESC_EA9551AA	SCP22-10	Homo sapiens		Netherlands
ESC_EA9578AA	SCP20-43	Homo sapiens		Netherlands
ESC_EA9589AA	SCP20-11	Homo sapiens		Netherlands
ESC_EA9611AA	SCP19-10	Homo sapiens		Netherlands
ESC_EA9625AA	SCP18-12	Homo sapiens		Netherlands
ESC_EA9640AA	SCP17-49-2	Homo sapiens		Netherlands
ESC_EA9643AA	SCP17-38	Homo sapiens		Netherlands
ESC_EA9651AA	SCP16-78	Homo sapiens		Netherlands
ESC_EA9668AA	SCP15-76	Homo sapiens		Netherlands
ESC_EA9674AA	SCP15-67-3	Homo sapiens		Netherlands
ESC_EA9685AA	SCP15-06	Homo sapiens		Netherlands
ESC_EA9767AA	SCP11-35	Homo sapiens		Netherlands
ESC_EA9774AA	SCP11-16	Homo sapiens		Netherlands
ESC_EA9833AA	SCP07-29	Homo sapiens		Netherlands
ESC_EA9861AA	SCP05-44	Homo sapiens		Netherlands
ESC_EA9874AA	SCP04-74	Homo sapiens		Netherlands
ESC_EA9890AA	SCP04-03	Homo sapiens		Netherlands
ESC_EA9920AA	SCP02-78	Homo sapiens		Netherlands
ESC_EA9955AA	SCP01-23	Homo sapiens		Netherlands
ESC_EA9961AA	SCK76-11	Homo sapiens		Netherlands
ESC_EA9981AA	SCK63-24	Homo sapiens		Netherlands
ESC_EA9984AA	SCK63-17	Homo sapiens		Netherlands
ESC_FA0001AA	SCK62-48	Homo sapiens		Netherlands
ESC_FA0091AA	SCK08-39	Homo sapiens		Netherlands
ESC_FA0128AA	SCK01-36	Homo sapiens		Netherlands
ESC_FA0136AA	SCP17-50-2	Homo sapiens		Netherlands
ESC_FA0153AA	SCP01-22-3	Homo sapiens		Netherlands
ESC_FA0217AA	SCK08-58	Homo sapiens		Netherlands
ESC_FA0747AA	268623	Homo sapiens; human	2016	United Kingdom
ESC_FA1401AA	253877	Homo sapiens; human	2016	United Kingdom
ESC_FA1451AA	262663	Homo sapiens; human	2016	United Kingdom
ESC_FA1603AA	168530	Homo sapiens; human	2015	United Kingdom
ESC_FA2128AA	15ET500476		2015	Sweden
ESC_FA2129AA	15ET500599		2015	Sweden
ESC_FA2141AA	SAMPLE_WTCHG_320308_295190
ESC_FA2156AA	SAMPLE_WTCHG_320308_288101
ESC_FA2217AA	SAMPLE_WTCHG_320308_255190
ESC_FA2265AA	SAMPLE_WTCHG_320308_231190
ESC_FA2267AA	SAMPLE_WTCHG_320308_230190
ESC_FA2269AA	SAMPLE_WTCHG_320308_229190
ESC_FA2275AA	SAMPLE_WTCHG_320308_225190
ESC_FA2301AA	SAMPLE_WTCHG_320308_212190
ESC_FA2302AA	SAMPLE_WTCHG_320308_212101
ESC_FA2304AA	SAMPLE_WTCHG_320308_211101
ESC_FA2315AA	SAMPLE_WTCHG_320308_205190
ESC_FA2321AA	SAMPLE_WTCHG_320308_202190
ESC_FA2323AA	SAMPLE_WTCHG_320308_201190
ESC_FA2630AA	294688	Homo sapiens; human	2016	United Kingdom
ESC_FA3074AA	SAMPLE_WTCHG_320308_284190
ESC_FA3098AA	SAMPLE_WTCHG_320308_271190
ESC_FA3197AA	E88	Broiler; liver	2015	Denmark
ESC_FA3831AA	141371	Homo sapiens; human	2015	United Kingdom
ESC_FA3869AA	142500	Homo sapiens; human	2015	United Kingdom
ESC_FA4057AA	255559	Homo sapiens; human	2016	United Kingdom
ESC_FA4641AA	Aru 636		2016	Sweden
ESC_FA4644AA	Aru 651		2016	Sweden
ESC_FA4645AA	Aru 652		2016	Sweden
ESC_FA4689AA	1F			Germany
ESC_FA4690AA	1S		2016	Germany
ESC_FA5120AA	E282	water		Australia	Non pathogen
ESC_FA5121AA	H566	Human		Australia	Pathogen
ESC_FA5122AA	E463	water		Australia	Non pathogen
ESC_FA5123AA	H264	Human		Australia	Non pathogen
ESC_FA5456AA	C1 / GCF_001900295	live_animal; faeces; cow
ESC_FA5457AA	MRSN346647	Homo sapiens; Clinical	2016	United States
ESC_FA5715AA	0000-0061-6746	Homo sapiens; Age: 41; female; abdominal	2016	United States
ESC_FA5718AA	0000-0061-6694	Homo sapiens; Age: 48; female; urine	2016	United States
ESC_FA6180AA	eadd5290-fa7c-11e5-8060-3c4a9275d6c8
ESC_FA6197AA	e42ab140-fa7c-11e5-8060-3c4a9275d6c8
ESC_FA6198AA	e3d628a0-fa7c-11e5-8060-3c4a9275d6c8
ESC_FA6199AA	e3868200-fa7c-11e5-8060-3c4a9275d6c8
ESC_FA6485AA	c039cb90-fa7c-11e5-b5da-3c4a9275d6c8
ESC_FA6486AA	c001f2b0-fa7c-11e5-b5da-3c4a9275d6c8
ESC_FA6492AA	be9bd300-fa7c-11e5-b5da-3c4a9275d6c8
ESC_FA6493AA	be67cab0-fa7c-11e5-b5da-3c4a9275d6c8
ESC_FA6601AA	b555dca0-fa7c-11e5-a43c-3c4a9275d6c8
ESC_FA6604AA	cfe099c0-fa7c-11e5-aecb-3c4a9275d6c8
ESC_FA6674AA	b96a7a80-fa7c-11e5-aecb-3c4a9275d6c8
ESC_FA6675AA	b9314210-fa7c-11e5-aecb-3c4a9275d6c8
ESC_FA6764AA	99925160-fa7c-11e5-850b-3c4a9275d6c8
ESC_FA6767AA	986c47f0-fa7c-11e5-850b-3c4a9275d6c8
ESC_FA6777AA	94c008d0-fa7c-11e5-850b-3c4a9275d6c8
ESC_FA6778AA	9471c1c0-fa7c-11e5-850b-3c4a9275d6c8
ESC_FA6779AA	9421cd00-fa7c-11e5-850b-3c4a9275d6c8
ESC_FA6780AA	93d840e0-fa7c-11e5-850b-3c4a9275d6c8
ESC_FA6856AA	cc707940-fa7c-11e5-a546-3c4a9275d6c8
ESC_FA6857AA	cc18bc50-fa7c-11e5-a546-3c4a9275d6c8
ESC_FA6873AA	e4177760-fa7c-11e5-ae86-3c4a9275d6c8
ESC_FA6874AA	e3d03530-fa7c-11e5-ae86-3c4a9275d6c8
ESC_FA6913AA	d7dbc0a0-fa7c-11e5-ae86-3c4a9275d6c8
ESC_FA7184AA	a7fb4860-fa7c-11e5-a5c7-3c4a9275d6c8
ESC_FA7245AA	9322faa0-fa7c-11e5-a5c7-3c4a9275d6c8
ESC_FA7287AA	9db4f900-fa7c-11e5-8060-3c4a9275d6c8
ESC_FA7296AA	9aa520f0-fa7c-11e5-8060-3c4a9275d6c8
ESC_FA7404AA	8f825440-fa7c-11e5-b612-3c4a9275d6c8
ESC_FA7583AA	MOD1-EC3671	veterinary clinical/research| turkey; feces young turkey (Meleagris gallopavo)	2014	United States
ESC_FA8257AA	MIAE02216 (11742)	Ouche River	2015	France
ESC_FA8258AA	MIAE02212	Environment	2015	France
ESC_FA8373AA	UMB15_01.1rot	Homo sapiens; urine
ESC_FA8399AA	737bb420-7fd4-11e6-b8fe-3c4a9275d6c8
ESC_FA8405AA	7339a210-7fd4-11e6-b8fe-3c4a9275d6c8
ESC_FA8414AA	72d38d40-7fd4-11e6-b8fe-3c4a9275d6c8
ESC_FA8422AA	727b0d00-7fd4-11e6-b8fe-3c4a9275d6c8
ESC_FA8433AA	71fa1d30-7fd4-11e6-b8fe-3c4a9275d6c8
ESC_FA8437AA	71d35b50-7fd4-11e6-b8fe-3c4a9275d6c8
ESC_FA8442AA	719eb6c0-7fd4-11e6-b8fe-3c4a9275d6c8
ESC_FA8460AA	70e68a50-7fd4-11e6-b8fe-3c4a9275d6c8
ESC_FA8478AA	700c2fe0-7fd4-11e6-b8fe-3c4a9275d6c8
ESC_FA8502AA	6824df20-7fd4-11e6-b8fe-3c4a9275d6c8
ESC_FA8504AA	6811cc50-7fd4-11e6-b8fe-3c4a9275d6c8
ESC_FA8514AA	67bcce80-7fd4-11e6-b8fe-3c4a9275d6c8
ESC_FA8534AA	6707af50-7fd4-11e6-b8fe-3c4a9275d6c8
ESC_FA8540AA	66d5a2d0-7fd4-11e6-b8fe-3c4a9275d6c8
ESC_FA8595AA	5e56cd00-7fd4-11e6-b8fe-3c4a9275d6c8
ESC_FA8649AA	5b746d90-7fd4-11e6-b8fe-3c4a9275d6c8
ESC_FA8655AA	5b262680-7fd4-11e6-b8fe-3c4a9275d6c8
ESC_FA8662AA	5ac73da0-7fd4-11e6-b8fe-3c4a9275d6c8
ESC_FA8668AA	5a78cf80-7fd4-11e6-b8fe-3c4a9275d6c8
ESC_FA8706AA	515afa90-7fd4-11e6-b8fe-3c4a9275d6c8
ESC_FA8712AA	51182530-7fd4-11e6-b8fe-3c4a9275d6c8
ESC_FA8733AA	503936e0-7fd4-11e6-b8fe-3c4a9275d6c8
ESC_FA8746AA	4fc4f140-7fd4-11e6-b8fe-3c4a9275d6c8
ESC_FA8912AA	Escherichia_coli_GW_UTI_052			United States
ESC_FA8919AA	86e18620-7fd4-11e6-b8fe-3c4a9275d6c8
ESC_FA8920AA	86d948c0-7fd4-11e6-b8fe-3c4a9275d6c8
ESC_FA8927AA	85fb6be0-7fd4-11e6-b8fe-3c4a9275d6c8
ESC_FA8953AA	7d8548a0-7fd4-11e6-b8fe-3c4a9275d6c8
ESC_FA8956AA	7d6bf440-7fd4-11e6-b8fe-3c4a9275d6c8
ESC_FA8958AA	7d5a6810-7fd4-11e6-b8fe-3c4a9275d6c8
ESC_FA8966AA	7d12d7c0-7fd4-11e6-b8fe-3c4a9275d6c8
ESC_FA8972AA	7cde0c20-7fd4-11e6-b8fe-3c4a9275d6c8
ESC_FA8977AA	7cb352a0-7fd4-11e6-b8fe-3c4a9275d6c8
ESC_FA8994AA	7c1cb7f0-7fd4-11e6-b8fe-3c4a9275d6c8
ESC_FA9008AA	7b9a6890-7fd4-11e6-b8fe-3c4a9275d6c8
ESC_FA9162AA	ME160480	Homo sapiens; human	2016	Ireland
ESC_FA9963AA	Ecol_545	Homo sapiens	2011	Vietnam
ESC_FA9968AA	Ecol_227	Homo sapiens	2010	Unresolved
ESC_GA0318AA	MOD1-EC5848	intestine	1984	United States
ESC_GA1057AA	Escherichia coli
ESC_GA1059AA	Escherichia coli
ESC_GA1060AA	Escherichia coli
ESC_GA1124AA	Escherichia coli
ESC_GA1140AA	Escherichia coli
ESC_GA1153AA	bca3d580-9c4c-11e6-8f55-3c4a9275d6c8
ESC_GA1159AA	Escherichia coli
ESC_GA1472AA	NC_STEC27	environmental-water| beans; bean water source	2014	United States
ESC_GA1523AA	JKHS009	sewage	2015	Japan
ESC_GA1534AA	JSWP030	sewage	2015	Japan
ESC_GA1540AA	JSWP024	sewage	2015	Japan
ESC_GA1546AA	JSWP018	sewage	2015	Japan
ESC_GA1548AA	JSWP016	sewage	2015	Japan
ESC_GA1559AA	JSWP005	sewage	2015	Japan
ESC_GA1851AA	PNUSAE005829			United States
ESC_GA2422AA	4ef400b0-a286-11e6-8d8d-3c4a9275d6c8
ESC_GA2483AA	4ca64020-a286-11e6-8d8d-3c4a9275d6c8
ESC_GA2489AA	4c55fd40-a286-11e6-8d8d-3c4a9275d6c8
ESC_GA2532AA	4324a050-a286-11e6-8d8d-3c4a9275d6c8
ESC_GA2539AA	42c8c4b0-a286-11e6-8d8d-3c4a9275d6c8
ESC_GA2553AA	42148fe0-a286-11e6-8d8d-3c4a9275d6c8
ESC_GA2560AA	41be5990-a286-11e6-8d8d-3c4a9275d6c8
ESC_GA3021AA	NC_STEC93	environmental-animal housing| chicken; chicken house fly trap	2014	United States
ESC_GA3087AA	317715	Homo sapiens; human	2016	United Kingdom
ESC_GA3133AA	266917	Homo sapiens; human	2016	United Kingdom
ESC_GA3273AA	d0e04300-6f4a-11e6-a83e-3c4a9275d6c8
ESC_GA3310AA	cf887b30-6f4a-11e6-a83e-3c4a9275d6c8
ESC_GA3500AA	NC_STEC127	environmental-factory/production facility; environmental swab sponge produce source	2015	United States
ESC_GA3620AA	NILS 42
ESC_GA3863AA	HE-MDREc48	Homo sapiens	2011	United States
ESC_GA3895AA	HE-MDREc12	Homo sapiens	2013	United States
ESC_GA4842AA	PNUSAE007073			United States
ESC_GA4860AA	1VDGSV85
ESC_GA4873AA	W1MSZ57S
ESC_GA4876AA	DYRLBL7E
ESC_GA4881AA	6OEHB4I9
ESC_GA4893AA	CXEVR5WS
ESC_GA4907AA	57XML21E
ESC_GA4909AA	YFSUS1V2
ESC_GA4915AA	I6BWYJLY
ESC_GA4919AA	ZSX69YKE
ESC_GA4949AA	OO5MK6GU
ESC_GA4976AA	QJZORXVC
ESC_GA4996AA	1OU2TNY7
ESC_GA5015AA	IB1A6TL9
ESC_GA5030AA	6T8582H7
ESC_GA5050AA	DOPVRQ9D
ESC_GA5063AA	2TYFEYMO
ESC_GA5069AA	K0X8MZQQ
ESC_GA5085AA	VMOUIXYY
ESC_GA5089AA	VORE1EJS
ESC_GA5100AA	TI4S1KOA
ESC_GA5112AA	6NK3RJN9
ESC_GA5115AA	9VIU5HNO
ESC_GA5118AA	C3AOGIBE
ESC_GA5130AA	M05BGOHB
ESC_GA5166AA	AS8CR8US
ESC_GA5173AA	X5XY2JIX
ESC_GA5186AA	OLXEA26X
ESC_GA5191AA	NI49485Y
ESC_GA5206AA	AZIB72HT
ESC_GA5209AA	FPKVYAA9
ESC_GA5217AA	DVPW3H4G
ESC_GA5223AA	N4USBWNF
ESC_GA5231AA	JL33KRVW
ESC_GA5279AA	I4Z2N55U
ESC_GA5325AA	J6GHEBC5
ESC_GA5331AA	48612H9A
ESC_GA5333AA	OJ4FSP7F
ESC_GA5336AA	997B1BRU
ESC_GA5346AA	S6SAU547
ESC_GA5356AA	O91WEGHJ
ESC_GA5357AA	B2L9XKUP
ESC_GA5389AA	W3Q86S9M
ESC_GA5693AA	ME160476	Homo sapiens; human	2016	Ireland
ESC_GA5694AA	ME160467	Homo sapiens; human	2016	Ireland
ESC_GA6546AA	DHQP1604385	Homo sapiens; urine	2015	United States
ESC_GA6547AA	DHQP1402220	Homo sapiens; urine	2014	United States
ESC_GA6549AA	DHQP1602379	Homo sapiens; urine	2015	United States
ESC_GA6954AA	CFSAN061768	dairy; raw milk cheese	2016	Egypt
ESC_GA6958AA	CFSAN061763	dairy; raw milk cheese	2016	Egypt
ESC_GA7091AA	N12-01555	Homo sapiens	2012	Canada
ESC_GA7092AA	N11-01498	Homo sapiens	2011	Canada
ESC_GA7093AA	N12-00403	Homo sapiens	2012	Canada
ESC_GA7101AA	N13-00085	Homo sapiens	2013	Canada
ESC_GA7106AA	N14-00182	Homo sapiens	2014	Canada
ESC_GA7107AA	N12-02197	Homo sapiens	2012	Canada
ESC_GA7160AA	MIAE02522	Environment	2014	France		ESBL CTX-M-14
ESC_GA7161AA	MIAE02308	Environment	2014	France		ESBL CTX-M-1
ESC_GA7162AA	MIAE02440		2015	France		ESBL CTX-M-15
ESC_GA7163AA	MIAE02512	Environment	2015	France		ESBL CTX-M-14
ESC_GA7164AA	MIAE02687		2014	France
ESC_GA7165AA	MIAE02516		2014	France		ESBL CTX-M-14
ESC_GA7166AA	MIAE02488	Environment	2014	France		ESBL CTX-M-14
ESC_GA7167AA	MIAE02551		2014	France		ESBL CTX-M-14
ESC_GA7168AA	MIAE02291	Environment	2015	France		ESBL CTX-M-15
ESC_GA7169AA	MIAE02525	Environment	2014	France		ESBL CTX-M-14
ESC_GA7170AA	MIAE02507		2015	France		ESBL CTX-M-15
ESC_GA7171AA	MIAE02514		2014	France		ESBL CTX-M-14
ESC_GA7184AA	EC-58	artificial; artificial gut model	2015	United Kingdom
ESC_GA7185AA	EC-57	artificial; artificial gut model	2015	United Kingdom
ESC_GA7188AA	EC-53	artificial; artificial gut model	2015	United Kingdom
ESC_GA7189AA	EC-50	artificial; artificial gut model	2015	United Kingdom
ESC_GA7191AA	EC-49	artificial; artificial gut model	2015	United Kingdom
ESC_GA7277AA	IOMTU792	Homo sapiens	2013	Nepal
ESC_GA7298AA	IOMTU531	Homo sapiens	2013	Nepal
ESC_GA7300AA	IOMTU413	Homo sapiens	2013	Nepal
ESC_GA7310AA	IOMTU355	Homo sapiens	2013	Nepal
ESC_GA8006AA	GH_47	Sowe downstream		United Kingdom
ESC_GA8085AA	0000-0062-1842	Homo sapiens; Age: 54; male; bile	2016	United States
ESC_GA8673AA	0000-0068-2671	Homo sapiens; Age: 67; female; urine	2017	United States
ESC_GA8674AA	0000-0067-4042	Homo sapiens; Age: 80; female; urine	2017	United States
ESC_GA9204AA	20170807_S018
ESC_GA9531AA	MER-43	Homo sapiens; Age: 55; male; Blood; blood	2014	Australia
ESC_GA9547AA	MER-112	Homo sapiens; Age: 63; male; Blood; blood	2015	Australia
ESC_GA9872AA	20160150	Homo sapiens; feces		Vietnam
ESC_GA9881AA	20160106	Homo sapiens; feces		Vietnam
ESC_GA9888AA	20160098	Homo sapiens; feces		Vietnam
ESC_GA9901AA	20151478	Homo sapiens; feces		Vietnam
ESC_GA9935AA	20151203	Homo sapiens; feces		Vietnam
ESC_GA9936AA	20151202	Homo sapiens; feces		Vietnam
ESC_GA9939AA	20151199	Homo sapiens; feces		Vietnam
ESC_GA9940AA	20151198	Homo sapiens; feces		Vietnam
ESC_HA0000AA	16019702_S33_L001_R1_001	Gallus gallus; Broiler meat	2016	France
ESC_HA0004AA	16018634_S29_L001_R1_001	Gallus gallus; Broiler meat	2016	France
ESC_HA0053AA	DTU2017-839-PRJ1111-Escherischia-coli-360-16039413_S20_L001_R1_001	Gallus gallus; Broiler meat	2016	France
ESC_HA0354AA	ECPSTH06	Homo sapiens; Age: 54 year; male; sputum	2016	Thailand
ESC_HA0360AA	ECPUTH08	Homo sapiens; Age: 72 year; female; urine	2016	Thailand
ESC_HA0364AA	ECH+23	Homo sapiens; Age: 37 year; male; Rectal swab	2014	Thailand
ESC_HA0803AA	FSIS11704072	animal-cattle-heifer	2017	United States
ESC_HA0927AA	MIAE02072 (10045)	Water	2012	France	Unknown
ESC_HA0928AA	MIAE02094 (10074)	Fish	2012	France	Unknown	ESBL CTX-M-15
ESC_HA0929AA	MIAE02098 (10141)	Fish	2012	France	Unknown
ESC_HA1262AA	MIAE10045	Unknown	2012	France	unknown	undetermined
ESC_HA1263AA	MIAE10141	Fish	2012	France	unknown	undetermined
ESC_HA1264AA	MIAE10074	Fish	2013	France	unknown	undetermined
ESC_HA1308AA	EF454	human	2014	Sweden	Pathogen
ESC_HA1312AA	EF566	human	2015	Sweden	Pathogen
ESC_HA1460AA	48-4-7/11742	Environment	2015	France	Unknown
ESC_HA1461AA	IBA6 MIAE 10502	Environment	2014	France	CTX-M, FosA3	ESBL CTX-M-14
ESC_HA1462AA	JEB8 MIAE 10523	Environment	2014	France	CTX-M, FosA3	ESBL CTX-M-14
ESC_HA1463AA	IET4 MIAE 10496	Environment	2014	France	CTX-M, FosA3	ESBL CTX-M-14
ESC_HA1464AA	48-1-7/11738	Environment	2015	France	Unknown
ESC_HA1465AA	BET3 MIAE 10375	Environment	2014	France	CTX-M, FosA3	ESBL CTX-M-1
ESC_HA1466AA	FFFEB2 MIAE 11482	Environment	2015	France	CTX-M, FosA3	ESBL CTX-M-15
ESC_HA1467AA	HHHET6 MIAE 11574	Environment	2015	France	CTX-M, FosA3	ESBL CTX-M-14
ESC_HA1468AA	QEB10 MIAE 10697	Environment	2014	France	CTX-M, FosA3
ESC_HA1469AA	HET6 MIAE 10510	Environment	2014	France	CTX-M, FosA3	ESBL CTX-M-14
ESC_HA1470AA	BBBET7 MIAE 11043	Environment	2015	France	CTX-M, FosA3	ESBL CTX-M-15
ESC_HA1471AA	IET9 MIAE 10499	Environment	2014	France	CTX-M, FosA3	ESBL CTX-M-14
ESC_HA1472AA	HHHEB7 MIAE 11565	Environment	2015	France	CTX-M, FosA3	ESBL CTX-M-15
ESC_HA1473AA	IBA10 MIAE 10505	Environment	2014	France	CTX-M, FosA3	ESBL CTX-M-14
ESC_HA2021AA	ME170085S	Homo sapiens; human	2017	Ireland
ESC_HA2766AA	BW_17	Homo sapiens; human perineal skin	2011	Germany
ESC_HA3137AA	0000-0069-5031	Homo sapiens; Age: 86; male; urine	2017	United States
ESC_HA3507AA	71c74ed0-535d-11e6-9a3d-3c4a9275d6c8
ESC_HA3508AA	71bd8ad0-535d-11e6-9a3d-3c4a9275d6c8
ESC_HA4020AA	234ece90-535d-11e6-9a3d-3c4a9275d6c8
ESC_HA4037AA	2238cab0-535d-11e6-9a3d-3c4a9275d6c8
ESC_HA4038AA	222df540-535d-11e6-9a3d-3c4a9275d6c8
ESC_HA4039AA	221e64e0-535d-11e6-9a3d-3c4a9275d6c8
ESC_HA4040AA	2212cc20-535d-11e6-9a3d-3c4a9275d6c8
ESC_HA4044AA	21dfd540-535d-11e6-9a3d-3c4a9275d6c8
ESC_HA4045AA	21d2b5e0-535d-11e6-9a3d-3c4a9275d6c8
ESC_HA4048AA	21ac9040-535d-11e6-9a3d-3c4a9275d6c8
ESC_HA7584AA	ecoli[ST-38]	Anas platyrhynchos; mallard duck	2015	Denmark
ESC_HA7627AA	ecoli[ST-38]	Gallus gallus; chicken meat	2015	Denmark
ESC_HA7640AA	ecoli[ST-38]	Gallus gallus; chicken meat	2015	Denmark
ESC_HA7641AA	ecoli[ST-38]	Gallus gallus; chicken meat	2015	Denmark
ESC_HA8330AA	ICBEc09		2013	Brazil
ESC_HA8331AA	ICBEc10		2013	Brazil
ESC_HA8334AA	ICBEcBL-II-15(1)		2013	Brazil
ESC_HA9242AA	KK011-1E	Bos taurus	2014	Japan
ESC_HA9288AA	JML250	Homo sapiens	2015	Japan
ESC_HA9435AA	JML071	Homo sapiens	2015	Japan
ESC_HA9441AA	JML065	Homo sapiens	2015	Japan
ESC_HA9583AA	MHE17	Homo sapiens	2004	Japan
ESC_HA9944AA	EF576	human	2015	Sweden	Pathogen
ESC_IA0009AA	EF515	human	2015	Sweden	Pathogen
ESC_IA0011AA	EF516	human	2015	Sweden	Pathogen
ESC_IA0016AA	EF520	human	2015	Sweden	Pathogen
ESC_IA0017AA	EF518	human	2015	Sweden	Pathogen
ESC_IA0023AA	EF541	human	2015	Sweden	Pathogen
ESC_IA0042AA	EF562	human	2015	Sweden	Pathogen
ESC_IA0114AA	ICBEcBL-III-02(2)			Brazil
ESC_IA0159AA	EF473	human	2014	Sweden	Pathogen
ESC_IA0161AA	EF470	human	2014	Sweden	Pathogen
ESC_IA0172AA	EF450	human	2014	Sweden	Pathogen
ESC_IA0175AA	EF460	human	2014	Sweden	Pathogen
ESC_IA0182AA	EF427	human	2014	Sweden	Pathogen
ESC_IA0211AA	EF353	human	2013	Sweden	Pathogen
ESC_IA0233AA	EF339	human	2013	Sweden	Pathogen
ESC_IA0236AA	p034e		2016	Ethiopia
ESC_IA0244AA	p042e		2016	Ethiopia
ESC_IA0252AA	p047e		2016	Ethiopia
ESC_IA0258AA	p066e		2016	Ethiopia
ESC_IA0266AA	p070e		2016	Ethiopia
ESC_IA0331AA	EF216	human	2012	Sweden	Pathogen
ESC_IA0648AA	PNUSAE010514			United States
ESC_IA1684AA	MOD1-EC5456	environmental-water; water	1993	United States
ESC_IA2127AA	SAMPLE_WTCHG_447699_292141
ESC_IA2130AA	SAMPLE_WTCHG_447699_288109
ESC_IA2138AA	SAMPLE_WTCHG_447699_279175
ESC_IA2139AA	SAMPLE_WTCHG_447699_279122
ESC_IA2142AA	SAMPLE_WTCHG_447699_277151
ESC_IA2148AA	SAMPLE_WTCHG_447699_273103
ESC_IA2211AA	SAMPLE_WTCHG_447699_206166
ESC_IA2743AA	DTU2016-1740-PRJ1084-1067-Escherichia-coli-8978-1B_S20_L001		2016	Lithuania
ESC_IA3531AA	NC_LB-4992	veterinary clinical/research| turkey; turkey intestine	2017	United States
ESC_IA3534AA	NC_LB-4980	veterinary clinical/research| turkey; turkey intestine	2017	United States
ESC_IA3535AA	NC_LB-4971	veterinary clinical/research| turkey; turkey intestine	2017	United States
ESC_IA4008AA	RL98	Meat; chicken breast	2012	Germany
ESC_IA4010AA	RL95	Meat; chicken drumstick	2012	Germany
ESC_IA4015AA	RL87	Meat; chicken breast	2012	Germany
ESC_IA4022AA	RL311	Meat; chicken meat raw	2012	Germany
ESC_IA4031AA	RL282	Meat; chicken drumstick	2012	Germany
ESC_IA4045AA	RL107	Meat; chicken breast	2015	Germany
ESC_IA4047AA	RL105	Meat; chicken breast	2014	Germany
ESC_IA4052AA	90-16	Homo sapiens; not provided	2016	Germany
ESC_IA4077AA	512-16	Bos taurus; boot swab sample	2012	Germany
ESC_IA4091AA	499-16	Gallus gallus domesticus; boot swab sample	2012	Germany
ESC_IA4092AA	498-16	Gallus gallus domesticus; faecal sample	2012	Germany
ESC_IA4101AA	490-16	Gallus gallus domesticus; faecal sample	2012	Germany
ESC_IA4111AA	481-16	Gallus gallus domesticus; faecal sample	2012	Germany
ESC_IA4126AA	469-16	Gallus gallus domesticus; cloacal swab	2011	Germany
ESC_IA4132AA	463-16	Gallus gallus domesticus; boot swab sample	2012	Germany
ESC_IA4133AA	46-16	Meat; chicken drumstick	2012	Germany
ESC_IA4146AA	37-16	Meat; food	2012	Germany
ESC_IA4152AA	213-16	Homo sapiens; not provided	2015	Germany
ESC_IA4154AA	160-16	Homo sapiens; urine	2016	Germany
ESC_IA4570AA	Sample 14		2017	Pakistan
ESC_IA4591AA	C14-03	Stools	2014	France
ESC_IA4779AA	MOD1-EC5407	veterinary clinical/research| other animal; intestine white-tailed deer (Odocoileus virginianus)	2006	United States
ESC_IA4823AA	INF9716R1E	environmental-water; water influent	2016	United States
ESC_IA5152AA	22_Esco_HA-NL	Homo sapiens; rectal swab	2012	Netherlands
ESC_IA5158AA	37_Esco_HA-DE	Homo sapiens; rectal swab	2012	Germany
ESC_IA5324AA	DTU2016_754_PRJ1055_Escherichia_coli_903_15096395_1	Broiler meat	2015	Denmark
ESC_IA5325AA	DTU2016_755_PRJ1055_Escherichia_coli_903_15096396_1	Broiler meat	2015	Denmark
ESC_IA5334AA	DTU2016_768_PRJ1055_Escherichia_coli_903_15114444_1	Broiler meat	2015	Denmark
ESC_IA5450AA	5593			Brazil
ESC_IA5632AA	35093	Homo sapiens; stool	2014	United States
ESC_IA5648AA	35462	Homo sapiens; stool	2015	United States
ESC_IA5660AA	35184	Homo sapiens; stool	2014	United States
ESC_IA7311AA	ECOL-17-VL-NY-MS-0035	veterinary clinical/research| companion animal; canine ear swab	2017	United States
ESC_IA7441AA	PNUSAE013061			United States
ESC_IA7838AA	100415	stool	2008	Gambia
ESC_IA7855AA	103530	stool	2010	Gambia
ESC_IA7871AA	103400	stool	2010	Gambia
ESC_IA7874AA	103709	stool	2010	Gambia
ESC_IA7878AA	102031	stool	2009	Gambia
ESC_IA7880AA	102098	stool	2009	Gambia
ESC_IA7882AA	102106	stool	2009	Gambia
ESC_IA8503AA	282458	Homo sapiens; human	2016	United Kingdom
ESC_IA9609AA	Mseq#40_92_A1241	Homo sapiens; fecal swab	2015	United Kingdom
ESC_IA9635AA	Mseq#40_80_A1008	Homo sapiens; fecal swab	2015	United Kingdom
ESC_IA9696AA	483061	Homo sapiens; human	2018	United Kingdom
ESC_JA1135AA	541975	Homo sapiens; human	2018	United Kingdom
ESC_JA1846AA	338387	Homo sapiens; human	2017	United Kingdom
ESC_JA3102AA	NC_CF361	chicken; chicken meat	2016	Brazil
ESC_JA3297AA	FSIS11810501	Animal-Turkey-Young Turkey	2018	United States
ESC_JA3301AA	FSIS11810500	Animal-Turkey-Young Turkey	2018	United States
ESC_JA4175AA	FSIS11810883	animal-chicken-young chicken	2018	United States
ESC_JA5692AA	AVC51	missing	2008	Australia		APEC
ESC_JA6686AA	FSIS11811930	animal-chicken-young chicken	2018	United States
ESC_JA7006AA	FSIS11812015	animal-chicken-young chicken	2018	United States
ESC_JA7499AA
ESC_JA7504AA
ESC_JA7505AA
ESC_JA7522AA
ESC_JA7523AA
ESC_JA7524AA
ESC_JA7605AA
ESC_JA7630AA
ESC_JA7715AA
ESC_JA7819AA
ESC_JA7929AA	PSU-0764	other animal; goat caprine	2013	United States
ESC_JA8041AA
ESC_JA8228AA	TUM18736	Homo sapiens	2017
ESC_JA8235AA	TUM18729	Homo sapiens	2017
ESC_JA8240AA	TUM18724	Homo sapiens	2017
ESC_JA8307AA	TUM18657	Homo sapiens	2016
ESC_JA8311AA	TUM18653	Homo sapiens	2016
ESC_JA8358AA	TUM18606	Homo sapiens	2017
ESC_JA8398AA	TUM18566	Homo sapiens	2016
ESC_JA8686AA	266ESBA	Seagull; Chroicocephalus; ESBA	2017	Australia
ESC_JA8715AA	465ESBA	Seagull; Chroicocephalus; ESBA	2017	Australia
ESC_JA8770AA	256ESBA	Seagull; Chroicocephalus; ESBA	2017	Australia
ESC_JA8774AA	292CIPA	Seagull; Chroicocephalus; CIPA	2017	Australia
ESC_JA8812AA	274ESBA	Seagull; Chroicocephalus; ESBA	2017	Australia
ESC_JA8831AA	473CIPA	Seagull; Chroicocephalus; CIPA	2017	Australia
ESC_JA9190AA
ESC_JA9191AA
ESC_JA9192AA
ESC_JA9193AA
ESC_JA9196AA
ESC_JA9197AA
ESC_JA9199AA
ESC_JA9274AA	Sample8			Pakistan	Pathogen
ESC_JA9282AA	Sample18			Pakistan	Pathogen
ESC_JA9290AA	Sample212			Pakistan	Pathogen
ESC_JA9318AA	Sample166			Pakistan	Pathogen
ESC_JA9324AA	Sample167			Pakistan	Pathogen
ESC_JA9327AA	Sample63			Pakistan	Pathogen
ESC_JA9335AA	Sample70			Pakistan	Pathogen
ESC_JA9337AA	Sample81			Pakistan	Pathogen
ESC_JA9338AA	Sample84			Pakistan	Pathogen
ESC_JA9339AA	Sample80			Pakistan	Pathogen
ESC_JA9340AA	Sample87			Pakistan	Pathogen
ESC_JA9350AA	Sample102			Pakistan	Pathogen
ESC_JA9356AA	Sample97			Pakistan	Pathogen
ESC_JA9364AA	Sample120			Pakistan	Pathogen
ESC_JA9777AA
ESC_JA9778AA
ESC_KA0069AA	PSU-0894	mollusks (bi-valve); oyster	2016	United States
ESC_KA0470AA		Homo sapiens; Age: 72; male; Blood; blood	2015	Singapore
ESC_KA0512AA		Homo sapiens; Age: 67; female; Blood; blood	2017	Australia
ESC_KA0517AA		Homo sapiens; Age: 44; female; Blood; blood	2016	Canada
ESC_KA0526AA		Homo sapiens; Age: 76; female; Blood; blood	2017	Singapore
ESC_KA0552AA		Homo sapiens; Age: 76; female; Blood; blood	2017	Singapore
ESC_KA0614AA		Homo sapiens; Age: 33; female; Blood; blood	2017	Saudi Arabia
ESC_KA0616AA		Homo sapiens; Age: 52; female; Blood; blood	2017	Saudi Arabia
ESC_KA0754AA	ST38	Homo sapiens; Perirectal; Facility G	2010	United States
ESC_KA0755AA	ST38	Homo sapiens; Perirectal; Facility G	2010	United States
ESC_KA0770AA	ST38	Homo sapiens; Perirectal; Facility A	2010	United States
ESC_KA0860AA	ST38	Homo sapiens; Perirectal; Facility K	2010	United States
ESC_KA0887AA	ST38	Homo sapiens; Perirectal; Facility G	2010	United States
ESC_KA0940AA	ST38	Homo sapiens; Perirectal; Facility B	2013	United States
ESC_KA0941AA	ST38	Homo sapiens; Perirectal; Facility B	2013	United States
ESC_KA2054AA	G1733_4	Papio papio	2017	Gambia
ESC_KA2345AA	17007			Sweden
ESC_KA2351AA	17005			Sweden
ESC_KA2358AA	17010			Sweden
ESC_KA2371AA	17019			Sweden
ESC_KA2398AA	17043
ESC_KA2442AA	17079
ESC_KA2452AA	6005			Sweden
ESC_KA2453AA	17085
ESC_KA2456AA	6007			Sweden
ESC_KA2473AA	9008			Sweden
ESC_KA2480AA	9012			Sweden
ESC_KA2493AA	17105
ESC_KA2529AA	17129
ESC_KA2539AA	16013			Sweden
ESC_KA3311AA	619818	Homo sapiens; human	2018	United Kingdom
ESC_KA3673AA	CVM N17EC0110	Mixed Parts	2017	United States
ESC_KA3676AA	CVM N17EC0284	Chicken Breasts	2017	United States
ESC_KA3785AA	CVM N17EC0558	Chicken Wings	2017	United States
ESC_KA3933AA	CVM N17EC0837	Chicken Thighs	2017	United States
ESC_KA3958AA	CVM N17EC0056	Pork Chops	2017	United States
ESC_KA3960AA	CVM N17EC0060	Chicken Breasts	2017	United States
ESC_KA4006AA	CVM N17EC1230	Chicken Thighs	2017	United States
ESC_KA4085AA	CVM N17EC0154	Chicken Wings	2017	United States
ESC_KA4194AA	CVM N17EC1206	ground turkey	2017	United States
ESC_KA4418AA	623214	Homo sapiens; human	2018	United Kingdom
ESC_KA5054AA	ecoli014	Homo sapiens; hospital	2013	Switzerland
ESC_KA5058AA	ecoli010	Homo sapiens; hospital	2013	Switzerland
ESC_KA5061AA	ecoli007	Homo sapiens; hospital	2016	Switzerland
ESC_KA5064AA	ecoli004	Homo sapiens; hospital	2016	Switzerland
ESC_KA5650AA	V8	Equus caballus; stool	2009	Germany
ESC_KA7202AA	266917_2	Homo sapiens; feces	2016	United Kingdom
ESC_KA7282AA	144	canine	2002	United Kingdom
ESC_KA7375AA
ESC_KA7392AA
ESC_KA7442AA
ESC_KA7535AA
ESC_KA7538AA
ESC_KA7593AA
ESC_KA7644AA
ESC_KA7876AA	B7414
ESC_KA7987AA	GCID_CRE_0011	urine		Egypt
ESC_KA8403AA	M197X	clinical/research| human; Homo sapiens; stool	2017	Sri Lanka
ESC_KA8428AA	B072X	clinical/research| human; Homo sapiens; stool	2017	Sri Lanka
ESC_KA8432AA	M004XC2	clinical/research| human; Homo sapiens; stool	2017	Sri Lanka
ESC_KA8470AA	654718	Homo sapiens; human	2018	United Kingdom
ESC_KA8640AA	14S05120-2	Bos taurus; feces	2014	Netherlands
ESC_KA8664AA	14S04220-2	Bos taurus; feces	2014	Netherlands
ESC_KA8677AA	14S04120-2	Bos taurus; feces	2014	Netherlands
ESC_KA8755AA	14S02104-1	Bos taurus; feces	2014	Netherlands
ESC_KA8756AA	14S02103-1	Bos taurus; feces	2014	Netherlands
ESC_KA9110AA	E-1246	Homo sapiens	2008	Sweden
ESC_KA9675AA	HSP1014		2018	Spain
ESC_KA9678AA	HVH1011		2018	Spain
ESC_KA9679AA	PSM1001		2018	Spain
ESC_KA9690AA
ESC_KA9691AA
ESC_KA9739AA
ESC_KA9745AA	ERS1995222
ESC_KA9761AA	ERS1995159
ESC_KA9861AA
ESC_KA9862AA
ESC_KA9876AA	ERS1995235
ESC_KA9895AA	ERS1995210
ESC_LA0083AA
ESC_LA0097AA	ERS1994926
ESC_LA1547AA	M044x	clinical/research| human; Homo sapiens; stool	2017	Sri Lanka
ESC_LA2312AA	E55_6	Homo sapiens; male; stool	2014
ESC_LA2343AA	C14_2A	Homo sapiens; female; stool	2015	Ecuador
ESC_LA2375AA	E72_3	Homo sapiens; male; stool	2014
ESC_LA2406AA	B75_5	Homo sapiens; male; stool	2014
ESC_LA2412AA	E92_5	Homo sapiens; male; stool	2014
ESC_LA2448AA	E100_4	Homo sapiens; female; stool	2014
ESC_LA2498AA	E158	Homo sapiens; male; stool	2014
ESC_LA2505AA	B226_1	Homo sapiens; male; stool	2015
ESC_LA2517AA	E16_6	Homo sapiens; male; stool	2014
ESC_LA2537AA	R113_1	Homo sapiens; male; stool	2015	Ecuador
ESC_LA3197AA	ERS2595559
ESC_LA3437AA	ERS2367437	Human, Food	2016	Cambodia
ESC_LA3440AA	ERS2367434	Human, Food	2016	Cambodia
ESC_LA3458AA	ERS2367415	Human, Food	2016	Cambodia
ESC_LA3484AA	ERS2367387	Human, Food	2016	Cambodia
ESC_LA3485AA	ERS2367386	Human, Food	2016	Cambodia
ESC_LA3825AA	236	Homo sapiens; urine	1999	United States
ESC_LA3826AA	272	Homo sapiens; feces	1998	United States
ESC_LA3830AA	1271	Homo sapiens; feces	2002	United States
ESC_LA3862AA	1129	Homo sapiens; blood	1997	United States
ESC_LA4976AA	CRE16	Homo sapiens; blood; bloodstream	2014
ESC_LA5140AA	GASRECE110	Homo sapiens; blood	2012	Singapore
ESC_LA5173AA	GASRECE42	Homo sapiens; blood	2011	Singapore
ESC_LA5174AA	GASRECE43	Homo sapiens; blood	2012	Singapore
ESC_LA5178AA	GASRECE90	Homo sapiens; blood	2012	Singapore
ESC_LA5203AA	JIE4088	Homo sapiens; urine	2014	Australia
ESC_LA5236AA	JIE977	Homo sapiens	2009	Australia
ESC_LA5243AA	ME20	Homo sapiens	2008	Australia
ESC_LA5250AA	JIE3645	Homo sapiens; sputum	2013	Australia
ESC_LA5270AA	JIE3989	Homo sapiens	2013	Australia
ESC_LA5280AA	JIE4045	Homo sapiens; urine	2014	Australia
ESC_LA5350AA	LGE3262	Pasture; Pasture Soil; Soil	2015
ESC_LA5391AA	LGE0548	Deciduous Forest; Deciduous Forest Soil; Soil	2015
ESC_LA5496AA	LGE3122	Deciduous Forest; Deciduous Forest Soil; Soil	2015
ESC_LA5666AA	LGE0407	Grassland; Grassland Soil; Soil	2015
ESC_LA5667AA	LGE0411	Grassland; Grassland Soil; Soil	2015
ESC_LA5778AA	LGE3120	Deciduous Forest; Deciduous Forest Soil; Soil	2015
ESC_LA5805AA	LGE1512	Deciduous Forest; Deciduous Forest Soil; Soil	2015
ESC_LA6236AA	LGE0404	Grassland; Grassland Soil; Soil	2015
ESC_LA6488AA			2012	United States
ESC_LA6585AA			2012	United States
ESC_LA6645AA			2012	United States
ESC_LA6681AA			2012	United States
ESC_LA6730AA			2012	United States
ESC_LA6941AA			2012	United States
ESC_LA7072AA			2012	United States
ESC_LA8603AA	175552	Homo sapiens; human	2015	United Kingdom
ESC_LA8647AA	strain 15	Homo sapiens	2014	Singapore
ESC_LA8648AA	strain 14	Homo sapiens	2014	Singapore
ESC_LA8836AA	ERS1704029
ESC_LA8864AA	ERS1703972
ESC_LA8923AA	ERS1704017
ESC_LA8989AA	ERS1703533
ESC_LA9022AA
ESC_LA9073AA		Homo sapiens; .
ESC_LA9230AA	17e	Homo sapiens; .
ESC_LA9258AA		Homo sapiens; .
ESC_LA9503AA
ESC_LA9504AA
ESC_LA9910AA	AMI18
ESC_LA9961AA	APE6
ESC_LA9968AA	ATR2
ESC_MA0188AA	195	Homo sapiens; bloodstream isolates	2013	Canada
ESC_MA0207AA	5	Homo sapiens; bloodstream isolates	2010	Canada
ESC_MA0345AA	277	Homo sapiens; bloodstream isolates	2013	Canada
ESC_MA0367AA	287	Homo sapiens; bloodstream isolates	2013	Canada
ESC_MA0377AA	123	Homo sapiens; bloodstream isolates	2012	Canada
ESC_MA0417AA	259	Homo sapiens; bloodstream isolates	2013	Canada
ESC_MA0477AA	81	Homo sapiens; bloodstream isolates	2012	Canada
ESC_MA0558AA	ATR23
ESC_MA0588AA	BIC28
ESC_MA0625AA	CHI27
ESC_MA0626AA	CHI20
ESC_MA0632AA	CHI9
ESC_MA0654AA	JVE22
ESC_MA0658AA	LYO41
ESC_MA0701AA	NCK25
ESC_MA0703AA	NCK10
ESC_MA0705AA	NCK39
ESC_MA0709AA	NCK33
ESC_MA0721AA	NIC10
ESC_MA0731AA	RDP23
ESC_MA0756AA	ROU15
ESC_MA0888AA		chicken		Ghana
ESC_MA0893AA		chicken		Ghana
ESC_MA0911AA		human		Ghana
ESC_MA0932AA		human		Ghana
ESC_MA1083AA	A16		2018
ESC_MA1302AA	FSIS11918747	animal-cattle-beef cow	2019	United States
ESC_MA1601AA	ECOLI_MEC_055	Homo sapiens; urine	2016	Norway
ESC_MA1604AA	ECOLI_MEC_052	Homo sapiens; urine	2014	Norway
ESC_MA1614AA	ECOLI_MEC_041	Homo sapiens; urine	2014	Norway
ESC_MA1619AA	ECOLI_MEC_036	Homo sapiens; urine	2013	Norway
ESC_MA1639AA	ECOLI_MEC_016	Homo sapiens; urine	2013	Norway
ESC_MA1674AA	Escherichia coli	Homo sapiens; stool	2016	Vietnam
ESC_MA1691AA	Escherichia coli	Homo sapiens; stool	2014	Vietnam
ESC_MA1971AA	EF217	human	2012	Sweden	Pathogen
ESC_MA2129AA	Escherichia coli-420	Homo sapiens; Wound swab(deep extraction)	2014	Switzerland
ESC_MA2214AA		Homo sapiens; Urine(second portion)	2014	Switzerland
ESC_MA2432AA		Homo sapiens; Pharyngeal swab	2014	Switzerland
ESC_MA2482AA		Homo sapiens; Pharyngeal swab	2014	Switzerland
ESC_MA3018AA	NCK3
ESC_MA3059AA	d059-03	Homo sapiens; urine	2013
ESC_MA3121AA	G059	Homo sapiens	2010
ESC_MA3175AA	H123	Homo sapiens; wound	2010
ESC_MA3190AA	C037	Homo sapiens; Age: less than 1; urine	2010
ESC_MA3239AA	G152	Homo sapiens	2010
ESC_MA3250AA	A167	Homo sapiens; urine	2012
ESC_MA3285AA	C012	Homo sapiens; Age: 15; urine	2010
ESC_MA3321AA	A364	Homo sapiens; urine	2012
ESC_MA3345AA	A144	Homo sapiens; blood	2012
ESC_MA3350AA	U099	Homo sapiens; Age: 51; urine	2010
ESC_MA3365AA	H030	Homo sapiens; Age: 54; urine	2010
ESC_MA3483AA	67	Homo sapiens
ESC_MA3485AA	65	Homo sapiens
ESC_MA3536AA	RSA13
ESC_MA3651AA	C0381	Homo sapiens	2016
ESC_MA3699AA	FSIS11919702	animal-chicken-young chicken	2019	United States
ESC_MA3839AA	C0647	Homo sapiens	2016
ESC_MA3928AA	MH13
ESC_MA3994AA
ESC_MA4196AA	10 (B)	Homo sapiens
ESC_MA4206AA	BIC8
ESC_MA4212AA	RDE3
ESC_MA4216AA	RDE14
ESC_MA4313AA	CFSAN085892	veterinary clinical/research| other animal; rat feces from intestine (Rattus norvegicus)	2018	United States
ESC_MA4334AA	H-18_5			Gambia
ESC_MA4341AA	H-18_4			Gambia
ESC_MA4364AA	H-18_1			Gambia
ESC_MA4601AA	C79ctx		2012	Sweden	Pathogen
ESC_MA4736AA	N19
ESC_MA4753AA	N42
ESC_MA4806AA	N124
ESC_MA4818AA	N157
ESC_MA4880AA	N249
ESC_MA5012AA	PNUSAE023689			United States
ESC_MA5066AA	FSIS11920373	Animal-Turkey-Young Turkey	2019	United States
ESC_MA5131AA	CVM N18EC166	ground turkey	2018
ESC_MA5606AA	EC-119		2016	Italy
ESC_MA5650AA	EC-56		2016	Italy
ESC_MA5651AA	apec106		2016	Italy		APEC
ESC_MA5652AA	EC-58		2016	Italy
ESC_MA5688AA
ESC_MA5704AA
ESC_MA6894AA	19OR02CB18-EC	chicken	2019	United States
ESC_MA6946AA		Homo sapiens	2015	Oman
ESC_MA6947AA		Homo sapiens	2015	Oman
ESC_MA6949AA		Homo sapiens	2015	Oman
ESC_MA6954AA		Homo sapiens	2015	Oman
ESC_MA7014AA	FSIS11921010	animal-chicken-young chicken	2019	United States
ESC_MA7417AA	TMP024043	human	2016	Kenya
ESC_MA7549AA	TMP021131	human	2016	Kenya
ESC_MA8507AA	INT004362	avian	2016	Kenya
ESC_MA8670AA	ALQ032635	human	2016	Kenya
ESC_MA9001AA	PNUSAE024814			United States
ESC_NA0124AA	FSIS11921396	animal-chicken-young chicken	2019	United States
ESC_NA0638AA	FSIS11921895	animal-chicken-young chicken	2019	United States
ESC_NA0641AA	FSIS11921893	Animal-Turkey-Young Turkey	2019	United States
ESC_NA0683AA	755720	Homo sapiens; human	2019	United Kingdom
ESC_NA1045AA	19MD05GT11-EC	ground turkey	2019	United States
ESC_NA1284AA
ESC_NA1307AA
ESC_NA1409AA
ESC_NA1422AA
ESC_NA1425AA
ESC_NA1426AA
ESC_NA1567AA
ESC_NA1851AA	UMNPP15	Turkey clinical	2018
ESC_NA1902AA	NRZ-49312		2019	Germany
ESC_NA2020AA	PP254	Turkey clinical	2018
ESC_NA2023AA	PP258	Turkey clinical	2018
ESC_NA2121AA	PP406	Turkey clinical	2018
ESC_NA2384AA	PP899	Layer chicken gut	2018
ESC_NA2387AA	PP902	Broiler gut	2018
ESC_NA2530AA	RS911	Turkey gut	2018
ESC_NA2946AA	NRZ-48382		2019	Germany
ESC_NA2947AA	NRZ-49023b		2019	Germany
ESC_NA2948AA	NRZ-49454		2019	Germany
ESC_NA3082AA	NRZ-46029		2018	Germany
ESC_NA3083AA	NRZ-33259		2017	Germany
ESC_NA3084AA	NRZ-46985		2018	Germany
ESC_NA3085AA	NRZ-45489		2018	Germany
ESC_NA3086AA	NRZ-48899		2019	Germany
ESC_NA3088AA	NRZ-48630		2019	Germany
ESC_NA3090AA	NRZ-46669		2018	Germany
ESC_NA3091AA	NRZ-42031		2018	Germany
ESC_NA3092AA	NRZ-44203b		2018	Germany
ESC_NA3094AA	NRZ-33526		2017	Germany
ESC_NA3095AA	NRZ-43576a		2018	Germany
ESC_NA3096AA	NRZ-43505		2018	Germany
ESC_NA3097AA	NRZ-39327		2018	Germany
ESC_NA3099AA	NRZ-37661a		2017	Germany
ESC_NA3102AA	NRZ-42642a		2018	Germany
ESC_NA3104AA	NRZ-40267		2018	Germany
ESC_NA3105AA	NRZ-48295		2019	Germany
ESC_NA3106AA	NRZ-40406		2018	Germany
ESC_NA3107AA	NRZ-45168		2018	Germany
ESC_NA3108AA	NRZ-48606		2019	Germany
ESC_NA3113AA	NRZ-45041		2018	Germany
ESC_NA3115AA	NRZ-45412		2018	Germany
ESC_NA3116AA	NRZ-41288		2018	Germany
ESC_NA3117AA	NRZ-34426		2017	Germany
ESC_NA3119AA	NRZ-37282		2017	Germany
ESC_NA3121AA	NRZ-43598		2018	Germany
ESC_NA3123AA	NRZ-41951		2018	Germany
ESC_NA3124AA	NRZ-39562a		2018	Germany
ESC_NA3126AA	NRZ-47048		2018	Germany
ESC_NA3128AA	NRZ-33674		2017	Germany
ESC_NA3129AA	NRZ-45494		2018	Germany
ESC_NA3130AA	NRZ-47909		2019	Germany
ESC_NA3132AA	NRZ-45176		2018	Germany
ESC_NA3133AA	NRZ-43239		2018	Germany
ESC_NA3135AA	NRZ-33574		2017	Germany
ESC_NA3136AA	NRZ-41719		2018	Germany
ESC_NA3138AA	NRZ-42641		2018	Germany
ESC_NA3139AA	NRZ-48702		2019	Germany
ESC_NA3143AA	NRZ-46537		2018	Germany
ESC_NA3144AA	NRZ-43238		2018	Germany
ESC_NA3146AA	NRZ-48629a		2019	Germany
ESC_NA3147AA	NRZ-32229		2017	Germany
ESC_NA3152AA	NRZ-48186a		2019	Germany
ESC_NA3155AA	NRZ-37559		2017	Germany
ESC_NA3156AA	NRZ-46027		2018	Germany
ESC_NA3157AA	NRZ-46037		2018	Germany
ESC_NA3158AA	NRZ-38652		2017	Germany
ESC_NA3160AA	NRZ-47670		2018	Germany
ESC_NA3161AA	NRZ-48032		2019	Germany
ESC_NA3162AA	NRZ-48127		2019	Germany
ESC_NA3163AA	NRZ-47372		2018	Germany
ESC_NA3246AA			2017	Netherlands
ESC_NA3288AA	ERS2429159	faecal; Homo sapiens
ESC_NA3289AA	ERS2429158	faecal; Homo sapiens
ESC_NA3290AA	ERS2429157	faecal; Homo sapiens
ESC_NA3652AA	ecoli[ST-38]	Homo sapiens; urine	2017	France
ESC_NA3663AA	ecoli[ST-38]	Homo sapiens; urine	2016	France
ESC_NA3668AA	ecoli[ST-38]	Homo sapiens; urine	2016	France
ESC_NA3673AA	ecoli[ST-38]	Homo sapiens; urine	2015	France
ESC_NA3680AA	ecoli[ST-38]	Homo sapiens; urine	2016	France
ESC_NA3689AA	ecoli[ST-38]	Homo sapiens; urine	2016	France
ESC_NA3691AA	ecoli[ST-38]	Homo sapiens; urine	2016	France
ESC_NA3714AA	ecoli[ST-38]	Homo sapiens; urine	2015	France
ESC_NA3724AA	ecoli[ST-38]	Homo sapiens; urine	2017	France
ESC_NA3735AA	ecoli[ST-38]	Homo sapiens; urine	2016	France
ESC_NA3740AA	ecoli[ST-38]	Homo sapiens; urine	2016	France
ESC_NA3746AA	ecoli[ST-38]	Homo sapiens; urine	2016	France
ESC_NA3750AA	ecoli[ST-38]	Homo sapiens; urine	2017	France
ESC_NA3753AA	ecoli[ST-38]	Homo sapiens; urine	2015	France
ESC_NA3758AA	ecoli[ST-38]	Homo sapiens; urine	2016	France
ESC_NA3771AA	ecoli[ST-38]	Homo sapiens; urine	2017	France
ESC_NA3789AA	ecoli[ST-38]	Homo sapiens; urine	2015	France
ESC_NA3792AA	ecoli[ST-38]	Homo sapiens; urine	2017	France
ESC_NA3793AA	ecoli[ST-38]	Homo sapiens; urine	2017	France
ESC_NA3796AA	ecoli[ST-38]	Homo sapiens; urine	2016	France
ESC_NA3818AA	ecoli[ST-38]	Homo sapiens; urine	2016	France
ESC_NA3819AA	ecoli[ST-38]	Homo sapiens; urine	2017	France
ESC_NA4342AA	U1		2019	Japan
ESC_NA4613AA
ESC_NA4695AA
ESC_NA4813AA	PNUSAE026329			United States
ESC_NA5203AA	EC37	E-waste dumpsite	2017
ESC_NA5204AA	EC39	E-waste dumpsite	2017
ESC_NA5339AA	B425		2019
ESC_NA5342AA	B427		2019
ESC_NA5915AA	AUSMDU00005740	Homo sapiens	2016	Australia
ESC_NA5924AA	AUSMDU00003552	Homo sapiens	2014	Australia
ESC_NA5940AA	AUSMDU00005029	Homo sapiens	2015	Australia
ESC_NA6013AA	68618-E-Pi	Rectal sample	2012	Pakistan
ESC_NA6084AA	CVM N18EC1316	ground turkey	2018	United States
ESC_NA6169AA	76509-E-Pi	Rectal sample	2012	Pakistan
ESC_NA6392AA	11.1417	Bos taurus	2011	United States
ESC_NA6632AA	84.0568	Gallus gallus domesticus	1984	United States
ESC_NA6712AA	3.4685	Goose	2003	United States
ESC_NA6895AA	SS17M5850	Homo sapiens; RECTAL SWAB	2017	Australia
ESC_NA6896AA	SS17M5182	Homo sapiens; urine	2017	Australia
ESC_NA6897AA	SS17M5179	Homo sapiens; RECTAL SWAB	2017	Australia
ESC_NA6898AA	SS17M5178	Homo sapiens; RECTAL SWAB	2017	Australia
ESC_NA6899AA	SS17M5181	Homo sapiens; RECTAL SWAB	2017	Australia
ESC_NA6900AA	SS17M5180	Homo sapiens; RECTAL SWAB	2017	Australia
ESC_NA6901AA	SS17M5175	Homo sapiens; RECTAL SWAB	2017	Australia
ESC_NA6902AA	SS17M5174	Homo sapiens; RECTAL SWAB	2017	Australia
ESC_NA6903AA	SS17M5177	Homo sapiens; RECTAL SWAB	2017	Australia
ESC_NA6904AA	SS17M5176	Homo sapiens; RECTAL SWAB	2017	Australia
ESC_NA6905AA	SS17M5172	Homo sapiens; RECTAL SWAB	2017	Australia
ESC_NA6906AA	SS17M5173	Homo sapiens; RECTAL SWAB	2017	Australia
ESC_NA6907AA	SS17M5170	Homo sapiens; RECTAL SWAB	2017	Australia
ESC_NA6908AA	SS17M5171	Homo sapiens; RECTAL SWAB	2017	Australia
ESC_NA6909AA	SS17M5168	Homo sapiens; RECTAL SWAB	2017	Australia
ESC_NA6910AA	SS17M5169	Homo sapiens; RECTAL SWAB	2017	Australia
ESC_NA6911AA	SS17M5166	Homo sapiens; RECTAL SWAB	2017	Australia
ESC_NA6912AA	SS17M5167	Homo sapiens; RECTAL SWAB	2017	Australia
ESC_NA6913AA	SS17M5164	Homo sapiens; RECTAL SWAB	2017	Australia
ESC_NA6914AA	SS17M5165	Homo sapiens; RECTAL SWAB	2017	Australia
ESC_NA6915AA	SS17M5163	Homo sapiens; RECTAL SWAB	2017	Australia
ESC_NA6916AA	SS17M5162	Homo sapiens; RECTAL SWAB	2017	Australia
ESC_NA6917AA	SS17M5157	Homo sapiens; RECTAL SWAB	2017	Australia
ESC_NA6918AA	SS17M5156	Homo sapiens; RECTAL SWAB	2017	Australia
ESC_NA6919AA	SS17M5155	Homo sapiens; RECTAL SWAB	2017	Australia
ESC_NA6920AA	SS17M5154	Homo sapiens; RECTAL SWAB	2017	Australia
ESC_NA6921AA	SS17M5161	Homo sapiens; RECTAL SWAB	2017	Australia
ESC_NA6922AA	SS17M5160	Homo sapiens; RECTAL SWAB	2017	Australia
ESC_NA6923AA	SS17M5159	Homo sapiens; RECTAL SWAB	2017	Australia
ESC_NA6924AA	SS17M5158	Homo sapiens; RECTAL SWAB	2017	Australia
ESC_NA6925AA	SS17M5146	Homo sapiens; RECTAL SWAB	2017	Australia
ESC_NA6926AA	SS17M5147	Homo sapiens; RECTAL SWAB	2017	Australia
ESC_NA6927AA	SS17M5148	Homo sapiens; RECTAL SWAB	2017	Australia
ESC_NA6928AA	SS17M5149	Homo sapiens; RECTAL SWAB	2017	Australia
ESC_NA6929AA	SS17M5138_cpe	Homo sapiens; RECTAL SWAB	2017	Australia
ESC_NA6930AA	SS17M5139	Homo sapiens; RECTAL SWAB	2017	Australia
ESC_NA6931AA	SS17M5144	Homo sapiens; RECTAL SWAB	2017	Australia
ESC_NA6932AA	SS17M5145	Homo sapiens; RECTAL SWAB	2017	Australia
ESC_NA6933AA	SS17M5151	Homo sapiens; RECTAL SWAB	2017	Australia
ESC_NA6934AA	SS17M5152	Homo sapiens; RECTAL SWAB	2017	Australia
ESC_NA6935AA	SS17M420	Homo sapiens; RECTAL SWAB	2017	Australia
ESC_NA6936AA	SS17M419	Homo sapiens; RECTAL SWAB	2017	Australia
ESC_NA6937AA	SS17M423	Homo sapiens; ENV	2017	Australia
ESC_NA6938AA	SS17M422	Homo sapiens; RECTAL SWAB	2017	Australia
ESC_NA6939AA	SS17M4882	Homo sapiens; urine	2017	Australia
ESC_NA6940AA	SS17M424	Homo sapiens; ENV	2017	Australia
ESC_NA6941AA	SS17M5125_cpe	Homo sapiens; RECTAL SWAB	2017	Australia
ESC_NA6942AA	SS17M5119	Homo sapiens; RECTAL SWAB	2017	Australia
ESC_NA6943AA	SS17M5137_cpe	Homo sapiens; RECTAL SWAB	2017	Australia
ESC_NA6944AA	SS17M5133	Homo sapiens; RECTAL SWAB	2017	Australia
ESC_NA6945AA	SS17M6414	Homo sapiens; RECTAL SWAB	2017	Australia
ESC_NA6946AA	SS17M6413	Homo sapiens; RECTAL SWAB	2017	Australia
ESC_NA6947AA	SS17M6415	Homo sapiens; urine	2017	Australia
ESC_NA6948AA	SS17M7624-2	Homo sapiens; BLOOD CULTURE	2017	Australia
ESC_NA6949AA	SS17M6411	Homo sapiens; RECTAL SWAB	2017	Australia
ESC_NA6950AA	SS17M6412	Homo sapiens; RECTAL SWAB	2017	Australia
ESC_NA6951AA	SS17M6405	Homo sapiens; RECTAL SWAB	2017	Australia
ESC_NA6952AA	SS17M6406	Homo sapiens; RECTAL SWAB	2017	Australia
ESC_NA6953AA	SS17M6403	Homo sapiens; RECTAL SWAB	2017	Australia
ESC_NA6954AA	SS17M6404	Homo sapiens; RECTAL SWAB	2017	Australia
ESC_NA6955AA	SS17M6409	Homo sapiens; RECTAL SWAB	2017	Australia
ESC_NA6956AA	SS17M6410	Homo sapiens; RECTAL SWAB	2017	Australia
ESC_NA6957AA	SS17M6407	Homo sapiens; RECTAL SWAB	2017	Australia
ESC_NA6958AA	SS17M6408	Homo sapiens; RECTAL SWAB	2017	Australia
ESC_NA6959AA	SS17M6400	Homo sapiens; RECTAL SWAB	2017	Australia
ESC_NA6960AA	SS17M6399	Homo sapiens; RECTAL SWAB	2017	Australia
ESC_NA6961AA	SS17M6398	Homo sapiens; BUTTOCK SWAB	2017	Australia
ESC_NA6962AA	SS17M6397	Homo sapiens; RECTAL SWAB	2017	Australia
ESC_NA6963AA	SS17M6396	Homo sapiens; RECTAL SWAB	2017	Australia
ESC_NA6964AA	SS17M6395	Homo sapiens; RECTAL SWAB	2017	Australia
ESC_NA6965AA	SS17M6394	Homo sapiens; RECTAL SWAB	2017	Australia
ESC_NA6966AA	SS17M6393	Homo sapiens; RECTAL SWAB	2017	Australia
ESC_NA6967AA	SS17M6402	Homo sapiens; RECTAL SWAB	2017	Australia
ESC_NA6968AA	SS17M6401	Homo sapiens; RECTAL SWAB	2017	Australia
ESC_NA6969AA	M94949	Homo sapiens; BLOOD CULTURE	2017	Australia
ESC_NA6970AA	MS14445	Homo sapiens; RECTAL SWAB	2017	Australia
ESC_NA6971AA	MS14443	Homo sapiens; RECTAL SWAB	2017	Australia
ESC_NA6972AA	MS14442	Homo sapiens; RECTAL SWAB	2017	Australia
ESC_NA6973AA	MS14441	Homo sapiens; RECTAL SWAB	2017	Australia
ESC_NA6974AA	MS14447	Homo sapiens; RECTAL SWAB	2017	Australia
ESC_NA6975AA	MS14446	Homo sapiens; RECTAL SWAB	2017	Australia
ESC_NA6976AA	SS17M5855	Homo sapiens; RECTAL SWAB	2017	Australia
ESC_NA6977AA	SS17M5862	Homo sapiens; RECTAL SWAB	2017	Australia
ESC_NA6978AA	SS17M5874	Homo sapiens; RECTAL SWAB	2017	Australia
ESC_NA6979AA	SS17M5888	Homo sapiens; RECTAL SWAB	2017	Australia
ESC_NA6980AA	SS17M5890	Homo sapiens; RECTAL SWAB	2017	Australia
ESC_NA6981AA	SS17M6388	Homo sapiens; RECTAL SWAB	2017	Australia
ESC_NA6982AA	SS17M6389	Homo sapiens; RECTAL SWAB	2017	Australia
ESC_NA6983AA	SS17M6390	Homo sapiens; RECTAL SWAB	2017	Australia
ESC_NA6984AA	SS17M6391	Homo sapiens; RECTAL SWAB	2017	Australia
ESC_NA6985AA	SS17M6392	Homo sapiens; RECTAL SWAB	2017	Australia
ESC_NA7799AA	CVM N18EC1084	Chicken Breasts	2018	United States
ESC_NA7815AA	CVM N18EC0716	ground turkey	2018	United States
ESC_NA7843AA	CVM N18EC0688	Chicken Legs	2018	United States
ESC_NA7849AA	CVM N18EC0680	ground turkey	2018	United States
ESC_NA8087AA	ECOL-18-VL-OH-WA-0036	veterinary clinical/research| companion animal; urine (Canis lupus familaris)	2018	United States
ESC_NA8139AA	CVM N18EC0752	Chicken thighs	2018	United States
ESC_NA9243AA	CN-004		2017	China
ESC_NA9771AA	CN-014-D		2017	China
ESC_NA9821AA	CN-102		2017
ESC_NA9952AA	CN-113-D		2017	China
ESC_OA0026AA	nrz-42071		2018	Germany
ESC_OA0158AA	CN-038		2017
ESC_OA0318AA	CN-062		2017
ESC_OA0469AA	79078	Homo sapiens; Age: 70; female; urine	2008	Canada
ESC_OA0494AA	80960	Homo sapiens; Age: 76; male; blood	2008	Canada
ESC_OA0975AA	CN-248-D		2017	China
ESC_OA0976AA	CN-260-D		2017	China
ESC_OA0981AA	CN-286-D		2017	China
ESC_OA1610AA	CN-291-D		2017	China
ESC_OA1617AA	CN-144-F		2017	China		Diarrhoea
ESC_OA1620AA	CN-363-D		2017	China
ESC_OA1623AA	CN-368		2018
ESC_OA1701AA	AUSMDU00008438	Homo sapiens	2017	Australia
ESC_OA1709AA	AUSMDU00008420	Homo sapiens	2017	Australia
ESC_OA1771AA	AUSMDU00008524	Homo sapiens	2017	Australia
ESC_OA1774AA	AUSMDU00008521	Homo sapiens	2017	Australia
ESC_OA1786AA	AUSMDU00008379	Homo sapiens	2017	Australia
ESC_OA1790AA	AUSMDU00034379	Homo sapiens	2017	Australia
ESC_OA1796AA	AUSMDU00034378	Homo sapiens	2017	Australia
ESC_OA1813AA	AUSMDU00034377	Homo sapiens	2017	Australia
ESC_OA1835AA	AUSMDU00007999	Homo sapiens	2017	Australia
ESC_OA1845AA	AUSMDU00007860	Homo sapiens	2017	Australia
ESC_OA1849AA	AUSMDU00007855	Homo sapiens	2017	Australia
ESC_OA1854AA	AUSMDU00007849	Homo sapiens	2017	Australia
ESC_OA1855AA	AUSMDU00007848	Homo sapiens	2017	Australia
ESC_OA1876AA	AUSMDU00007413	Homo sapiens	2017	Australia
ESC_OA1882AA	AUSMDU00007305	Homo sapiens	2017	Australia
ESC_OA1905AA	81270	Homo sapiens; Age: 81; female; blood	2008	Canada
ESC_OA1916AA	CN-394-F		2018	China		Diarrhoea
ESC_OA1921AA	CN-397		2018
ESC_OA1939AA	CN-405-F		2018	China		Diarrhoea
ESC_OA1946AA	CN-419-F		2018	China		Diarrhoea
ESC_OA1953AA	CN-148-F		2017	China		Diarrhoea
ESC_OA2142AA	CN-443-F		2018	China		Diarrhoea
ESC_OA2150AA	UMB7764	Homo sapiens; female		United States
ESC_OA2491AA
ESC_OA2544AA
ESC_OA2776AA	CN-497-F		2018	China		Diarrhoea
ESC_OA2777AA	CN-498-F		2018	China		Diarrhoea
ESC_OA2778AA	CN-496		2018	China
ESC_OA2784AA	CN-504-D		2018	China
ESC_OA2795AA	CN-508-D		2018	China
ESC_OA2797AA	CN-509		2018	China
ESC_OA2961AA	CN-539		2018	China
ESC_OA2962AA	CN-540-D		2018	China
ESC_OA2964AA	CN-541-D		2018	China
ESC_OA2986AA	CN-558-D		2018	China
ESC_OA2996AA	CN-166		2017	China
ESC_OA3001AA	CN-167		2017	China
ESC_OA3003AA	CN-570		2018	China
ESC_OA3004AA	CN-569-D		2018	China
ESC_OA3010AA	CN-175-F		2017	China		Diarrhoea
ESC_OA3012AA	CN-094-D		2017	China
ESC_OA3018AA	CN-580		2018	China
ESC_OA3019AA	CN-579-D		2018	China
ESC_OA3031AA	CN-582-D		2018	China
ESC_OA3032AA	CN-584		2018	China
ESC_OA3039AA	NRZ-35221		2017	Germany
ESC_OA3040AA	NRZ-43794		2018	Germany
ESC_OA3041AA	NRZ-49616		2019	Germany
ESC_OA3042AA	NRZ-42585b		2018	Germany
ESC_OA3046AA	NRZ-49707		2019	Germany
ESC_OA3048AA	NRZ-49618		2019	Germany
ESC_OA3049AA	NRZ-49706		2019	Germany
ESC_OA3052AA	NRZ-50242		2019	Germany
ESC_OA3053AA	NRZ-50602		2019	Germany
ESC_OA3054AA	NRZ-50698		2019	Germany
ESC_OA3055AA	NRZ-50225a		2019	Germany
ESC_OA3056AA	NRZ-50063		2019	Germany
ESC_OA3057AA	NRZ-50271		2019	Germany
ESC_OA3059AA	NRZ-50037		2019	Germany
ESC_OA3060AA	NRZ-50106a		2019	Germany
ESC_OA3062AA	NRZ-50904		2019	Germany
ESC_OA3063AA	NRZ-51050		2019	Germany
ESC_OA3064AA	NRZ-51013		2019	Germany
ESC_OA3066AA	NRZ-51349		2019	Germany
ESC_OA3067AA	NRZ-51236		2019	Germany
ESC_OA3068AA	NRZ-50963b		2019	Germany
ESC_OA3069AA	NRZ-51461		2019	Germany
ESC_OA3072AA	NRZ-51768		2019	Germany
ESC_OA3076AA	NRZ-51612		2019	Germany
ESC_OA3077AA	NRZ-51613		2019	Germany
ESC_OA3078AA	NRZ-51464		2019	Germany
ESC_OA3080AA	NRZ-51766		2019	Germany
ESC_OA3083AA	NRZ-52257		2019	Germany
ESC_OA3084AA	NRZ-52550		2019	Germany
ESC_OA3085AA	NRZ-51961		2019	Germany
ESC_OA3086AA	NRZ-52255		2019	Germany
ESC_OA3087AA	NRZ-52487		2019	Germany
ESC_OA3088AA	NRZ-52164		2019	Germany
ESC_OA3089AA	NRZ-51929		2019	Germany
ESC_OA3090AA	NRZ-52900		2019	Germany
ESC_OA3091AA	CN-601-D		2018	China
ESC_OA3095AA	NRZ-53217		2019	Germany
ESC_OA3096AA	NRZ-53235		2019	Germany
ESC_OA3097AA	NRZ-53213		2019	Germany
ESC_OA3098AA	NRZ-53420		2019	Germany
ESC_OA3099AA	NRZ-53423		2019	Germany
ESC_OA3100AA	NRZ-53257		2019	Germany
ESC_OA3101AA	NRZ-53254b		2019	Germany
ESC_OA3102AA	NRZ-53256		2019	Germany
ESC_OA3103AA	CN-603-D		2018	China
ESC_OA3105AA	NRZ-46433		2019	Germany
ESC_OA3106AA	NRZ-53594		2019	Germany
ESC_OA3108AA	NRZ-46200		2019	Germany
ESC_OA3109AA	NRZ-53497		2019	Germany
ESC_OA3126AA	CN-608-D		2018	China
ESC_OA3127AA	CN-605		2018	China
ESC_OA3139AA	CN-095-D		2017	China
ESC_OA3171AA	FSIS11923834	Animal-Turkey-Young Turkey	2019	United States
ESC_OA3197AA	CN-219		2017	China
ESC_OA3248AA	CN-174		2017	China
ESC_OA3370AA	101093	Homo sapiens; Age: 56; male; blood	2012	Canada
ESC_OA3635AA	CN-200		2017	China
ESC_OA3636AA	CN-229-D		2017	China
ESC_OA3855AA	SMG-19-1611		2019	United Kingdom
ESC_OA3994AA	CN-456-F		2018	China		Diarrhoea
ESC_OA4020AA	CN-196-F		2017	China		Diarrhoea
ESC_OA4216AA	CN-179-F		2017	China		Diarrhoea
ESC_OA4217AA	CN-184-F		2017	China		Diarrhoea
ESC_OA4263AA	111952	Homo sapiens; Age: 61; male; blood	2014	Canada
ESC_OA4300AA	CN-475-F		2018	China		Diarrhoea
ESC_OA4317AA	CN-221-D		2017	China
ESC_OA4456AA	CN-259-D		2017	China
ESC_OA4461AA	CN-273-D		2017	China
ESC_OA4462AA	CN-278-D		2017	China
ESC_OA4465AA	CN-283-D		2017	China
ESC_OA4468AA	CN-365-D		2017	China
ESC_OA4473AA	CN-526-D		2018	China
ESC_OA4478AA	CN-555-D		2018	China
ESC_OA4555AA	B1607260
ESC_OA4581AA	B1620415
ESC_OA4631AA	B1611754
ESC_OA4691AA	CN-002-D		2017	China
ESC_OA4777AA	19CO03CB24-EC	chicken breast	2019	United States
ESC_OA4857AA	16AR1206	Homo sapiens	2016	New Zealand
ESC_OA4875AA	16AR1154	Homo sapiens	2016	New Zealand
ESC_OA4883AA	16AR1025	Homo sapiens	2016	New Zealand
ESC_OA4916AA	16AR1701	Homo sapiens	2016	New Zealand
ESC_OA4927AA	16AR1664	Homo sapiens	2016	New Zealand
ESC_OA4945AA	16AR1069	Homo sapiens	2016	New Zealand
ESC_OA4975AA	16AR1061	Homo sapiens	2016	New Zealand
ESC_OA4985AA	16AR1541	Homo sapiens	2016	New Zealand
ESC_OA5005AA	16AR1490	Homo sapiens	2016	New Zealand
ESC_OA5010AA	16AR1483	Homo sapiens	2016	New Zealand
ESC_OA5016AA	16AR1477	Homo sapiens	2016	New Zealand
ESC_OA5020AA	16AR1474	Homo sapiens	2016	New Zealand
ESC_OA5029AA	16AR1445	Homo sapiens	2016	New Zealand
ESC_OA5041AA	16AR1425	Homo sapiens	2016	New Zealand
ESC_OA5049AA	16AR1416	Homo sapiens	2016	New Zealand
ESC_OA5056AA	16AR1407	Homo sapiens	2016	New Zealand
ESC_OA5057AA	16AR1406	Homo sapiens	2016	New Zealand
ESC_OA5058AA	16AR1048	Homo sapiens	2016	New Zealand
ESC_OA5090AA	16AR1323	Homo sapiens	2016	New Zealand
ESC_OA5093AA	16AR1318	Homo sapiens	2016	New Zealand
ESC_OA5107AA	79276	Homo sapiens; Age: 60; male; urine	2008	Canada
ESC_OA5126AA	74764	Homo sapiens; Age: 81; male; blood	2007	Canada
ESC_OA5131AA	72612	Homo sapiens; Age: 23; male; urine	2007	Canada
ESC_OA5176AA	116963	Homo sapiens; Age: 63; male; respiratory	2015	Canada
ESC_OA5423AA	114183	Homo sapiens; Age: 88; male; respiratory	2015	Canada
ESC_OA5497AA	AMGD29	Homo sapiens; stool
ESC_OA5498AA	AMGD28	Homo sapiens; stool
ESC_OA5499AA	AMGD27	Homo sapiens; stool
ESC_OA5500AA	AMGD26	Homo sapiens; stool
ESC_OA5518AA	AMGD01	Homo sapiens; stool
ESC_OA5526AA	5076	Homo sapiens; urine	2016	Brazil
ESC_OA5569AA	F26.1	Chicken; chicken carcass	2019	Brazil
ESC_OA5573AA	1815	Homo sapiens; urine	2016	Brazil
ESC_OA5579AA	F24.1	Chicken; chicken carcass	2019	Brazil
ESC_OA5584AA	F50.2	Chicken; chicken carcass	2019	Brazil
ESC_OA5680AA	84-19	Homo sapiens; urine	2019	Brazil
ESC_OA5681AA	81-19	Homo sapiens; urine	2019	Brazil
ESC_OA5697AA	16AR1272	Homo sapiens	2016	New Zealand
ESC_OA6042AA	Bd.Pg.58
ESC_OA6062AA	GWGS1455a_S6_L001_R1_001_CLC_dec17		2014	Netherlands
ESC_OA6151AA	AWGS170110_S5_L001_R1_001_CLC_dec17		2015	Netherlands
ESC_OA6190AA	AWGS170061_S3_L001_R1_001_CLC_dec17		2015	Netherlands
ESC_OA6199AA	AWGS170046_S12_L001_R1_001_CLC_dec17		2015	Netherlands
ESC_OA6302AA	263		2018
ESC_OA6413AA	19MD09GT16-EC	ground turkey	2019	United States
ESC_OA6532AA	DHQP1604654-1	Homo sapiens; blood	2016	United States
ESC_OA6540AA	DHQP1703003-1	Homo sapiens; urine	2016	United States
ESC_OA6570AA	14C.E.R17
ESC_OA6788AA	516_C3G	Feces, Gull (Larus spp.)	2016	United States
ESC_OA6814AA	362_C3G	Feces, Gull (Larus spp.)	2016	United States
ESC_OA7468AA	104337	Homo sapiens; Age: 81; female; urine	2013	Canada
ESC_OA7560AA	98356	Homo sapiens; Age: 56; female; blood	2011	Canada
ESC_OA7581AA	91012	Homo sapiens; Age: 90; female; urine	2010	Canada
ESC_OA7629AA	EPIGENEC	human blood
ESC_OA7683AA	EPIGENEC	human blood
ESC_OA7862AA	Escherichia coli serovar Escherichia coli 834777	Homo sapiens; human	2019	United Kingdom
ESC_OA7910AA	439996	Homo sapiens; feces	2017
ESC_OA7942AA	369862	Homo sapiens; feces	2017
ESC_OA7969AA	330546	Homo sapiens; feces	2017
ESC_OA8028AA	373833	Homo sapiens; feces	2017
ESC_OA8063AA	110118	Homo sapiens; Age: 72; male; respiratory	2014	Canada
ESC_OA8084AA	R29.1
ESC_OA8089AA	Escherichia coli	ground beef	2019	United States
ESC_OA8158AA	17-AB00050	food	2016	Germany
ESC_OA8205AA	106793	Homo sapiens; Age: 31; female; blood	2013	Canada
ESC_OA8251AA	LA251_40-0510	Homo sapiens; stool	2015	Laos
ESC_OA8252AA	LA252_40-0610	Homo sapiens; stool	2015	Laos
ESC_OA8256AA	LA253_40-0710	Homo sapiens; stool	2015	Laos
ESC_OA8257AA	LA254_40-0810	Homo sapiens; stool	2015	Laos
ESC_OA8288AA	LA023_5-3009	Homo sapiens; stool	2015	Laos
ESC_OA8388AA	LA094_13-0210	Homo sapiens; stool	2015	Laos
ESC_OA8397AA	LA108_16-0410	Homo sapiens; stool	2015	Laos
ESC_OA8415AA	LA095_13-0310	Homo sapiens; stool	2015	Laos
ESC_OA8435AA	ST38 carrying blaCTX-M-15	Homo sapiens; urine	2013	Sweden
ESC_OA8448AA	ST38 carrying blaCTX-M-14	Treated effluent water collected at a wastewater treatment plant	2013
ESC_OA8462AA	ST38 carrying blaCTX-M-15	Treated effluent water collected at a wastewater treatment plant	2013
ESC_OA8469AA	ST38 carrying blaCTX-M-15	Homo sapiens; urine	2013	Sweden
ESC_OA8477AA	ST38 carrying blaCTX-M-15	Water from Hjalmaren Lake	2013	Sweden
ESC_OA8501AA	ST38 carrying blaCTX-M-14	Water from Svartan River	2013	Sweden
ESC_OA8509AA	ST38 carrying blaCTX-M-3 and blaCTX-M-14b	Water from Svartan River	2013	Sweden
ESC_OA8512AA	ST38 carrying blaCTX-M-15	Water from Svartan River	2013	Sweden
ESC_OA8520AA	ST38 carrying blaCTX-M-14b	Homo sapiens; urine	2013	Sweden
ESC_OA8521AA	ST38 carrying blaCTX-M-3 and blaCTX-M-14b	Homo sapiens; urine	2013	Sweden
ESC_OA8526AA	ST38 carrying blaCTX-M-15	Homo sapiens; urine	2013	Sweden
ESC_OA8528AA	ST38 carrying blaCTX-M-15	Incoming wastewater from a wastewater treatment plant, after removal of large particulate matter	2013
ESC_OA8540AA	ST38 carrying blaCTX-M-14	Homo sapiens; urine	2013	Sweden
ESC_OA8547AA	ST38 carrying blaCTX-M-15	Incoming wastewater from a wastewater treatment plant, after removal of large particulate matter	2013
ESC_OA8551AA	ST38 carrying blaCTX-M-14	Incoming wastewater from a wastewater treatment plant, after removal of large particulate matter	2013
ESC_OA9559AA	29000689_Eco	human primary care urine
ESC_OA9561AA	29000687_Eco	human primary care urine
ESC_OA9564AA	29000684_Eco	human primary care urine
ESC_OA9586AA	29000488_Eco	human nosocomial urine
ESC_OA9591AA	29000482_Eco	human nosocomial urine
ESC_OA9614AA	29000837_Eco	human blood
ESC_OA9618AA	29000833_Eco	human blood
ESC_OA9619AA	29000832_Eco	human blood
ESC_OA9663AA	29000787_Eco	human blood
ESC_OA9664AA	29000786_Eco	human blood
ESC_OA9734AA	29000661_Eco	human primary care urine
ESC_OA9737AA	29000658_Eco	human primary care urine
ESC_OA9744AA	29000651_Eco	human primary care urine
ESC_OA9747AA	29000648_Eco	human primary care urine
ESC_OA9774AA	29000619_Eco	human primary care urine
ESC_OA9779AA	29000612_Eco	human primary care urine
ESC_OA9789AA	29000602_Eco	human primary care urine
ESC_OA9801AA	29000590_Eco	human primary care urine
ESC_OA9802AA	29000589_Eco	human primary care urine
ESC_OA9818AA	29000570_Eco	human primary care urine
ESC_OA9833AA	29000554_Eco	human primary care urine
ESC_OA9845AA	29000542_Eco	human primary care urine
ESC_OA9846AA	29000541_Eco	human primary care urine
ESC_OA9861AA	29000524_Eco	human primary care urine
ESC_PA0243AA	AS003587	Homo sapiens	1997	United States
ESC_PA0805AA	A1_136	feces; Larus sp. (gull)	2016	United States
ESC_PA0806AA	A1_117_Soldotna_15Aug16_19	Feces, Gull (Larus spp.)	2016
ESC_PA0807AA	A1_106_Kasilof_15Aug16_22	Feces, Gull (Larus spp.)	2016	United States
ESC_PA0808AA	A1_104_Kasilof_15Aug16_21	Feces, Gull (Larus spp.)	2016	United States
ESC_PA0814AA	MAJ679A7	Homo sapiens; human stool sample	2012	Niger
ESC_PA0815AA	MAJ679A8	Homo sapiens; human stool sample	2012	Niger
ESC_PA0818AA	MAJ679A3	Homo sapiens; human stool sample	2012	Niger
ESC_PA0819AA	MAJ679A4	Homo sapiens; human stool sample	2012	Niger
ESC_PA0830AA	MAJ679A37	Homo sapiens; human stool sample	2012	Niger
ESC_PA0831AA	MAJ679A38	Homo sapiens; human stool sample	2012	Niger
ESC_PA0840AA	MAJ679A17	Homo sapiens; human stool sample	2012	Niger
ESC_PA0841AA	MAJ679A18	Homo sapiens; human stool sample	2012	Niger
ESC_PA0842AA	MAJ679A19	Homo sapiens; human stool sample	2012	Niger
ESC_PA0843AA	MAJ679A20	Homo sapiens; human stool sample	2012	Niger
ESC_PA0856AA	MAJ679A28	Homo sapiens; human stool sample	2012	Niger
ESC_PA0857AA	MAJ679A27	Homo sapiens; human stool sample	2012	Niger
ESC_PA0910AA	EC00684	Homo sapiens; urine	2017	United States
ESC_PA0984AA	EC36_ST38H	Homo sapiens; blood culture	2013	Australia
ESC_PA1015AA	EC274_ST38H	Homo sapiens; blood culture	2015	Australia
ESC_PA1018AA	EC231_ST38C	Homo sapiens; blood culture	2014	Australia
ESC_PA1242AA	Escherichia_coli_GW_UTI_042	urine	2013	United States
ESC_PA1244AA	Escherichia_coli_GW_UTI_035	urine	2013	United States
ESC_PA1264AA	Escherichia_coli_GW_Meat_089	Retail Poultry	2013	United States
ESC_PA1302AA	Escherichia_coli_GW_UTI_047	urine	2013	United States
ESC_PA1325AA	Escherichia_coli_GW_UTI_007	urine	2013	United States
ESC_PA1338AA	ST131-NUH-ECO-026	Homo sapiens; blood	2015	Singapore
ESC_PA1348AA	ST131-SGH-ECO-039	Homo sapiens; blood	2015	Singapore
ESC_PA1363AA	ST131UMMC02	Homo sapiens; blood	2015	Malaysia
ESC_PA1380AA	ST131UMMC13	Homo sapiens; blood	2015	Malaysia
ESC_PA1391AA	ST131-NUH-ECO-022	Homo sapiens; blood	2015	Singapore
ESC_PA1395AA	ST131-TUH-ECO-002	Homo sapiens; blood	2015	Thailand
ESC_PA1444AA	ST131-TTSH-ECO-021	Homo sapiens; blood	2015	Singapore
ESC_PA1453AA	ST131UMMC25	Homo sapiens; blood	2015	Malaysia
ESC_PA1482AA	ST131-NUH-ECO-039	Homo sapiens; blood	2015	Singapore
ESC_PA1875AA	1657-ESBL	Homo sapiens; stool	2017	Singapore
ESC_PA1882AA	115-ESBL	Homo sapiens; stool	2017	Singapore
ESC_PA1891AA	913-ESBL	Homo sapiens; rectal swab	2017	Singapore
ESC_PA1895AA	457-ESBL	Homo sapiens; rectal swab	2017	Singapore
ESC_PA1906AA	1409-ESBL	Homo sapiens; stool	2017	Singapore
ESC_PA1922AA	579-ESBL	Homo sapiens; rectal swab	2017	Singapore
ESC_PA1931AA	280-ESBL	Homo sapiens; stool	2017	Singapore
ESC_PA1937AA	2182-ESBL	Homo sapiens; rectal swab	2017	Singapore
ESC_PA1942AA	EC00682	Homo sapiens; urine	2017	United States
ESC_PA1945AA	EC00623	Homo sapiens; sputum	2017	United States
ESC_PA1947AA	EC00621	Homo sapiens; urine	2017	United States
ESC_PA1948AA	EC00622	Homo sapiens; urine	2017	United States
ESC_PA1952AA	EC00618	Homo sapiens; urine	2017	United States
ESC_PA1964AA	EC00615	Homo sapiens; sputum	2017	United States
ESC_PA1976AA	EC00641	Homo sapiens; wound	2017	United States
ESC_PA1977AA	EC00642	Homo sapiens; sputum	2017	United States
ESC_PA2001AA	EC00603	Homo sapiens; urine	2017	United States
ESC_PA2012AA	EC00636	Homo sapiens; sputum	2017	United States
ESC_PA2014AA	EC00634	Homo sapiens; blood	2017	United States
ESC_PA2016AA	EC00632	Homo sapiens; sputum	2017	United States
ESC_PA2027AA	EC00591	Homo sapiens; BAL	2016	United States
ESC_PA2028AA	EC00590	Homo sapiens; sputum	2016	United States
ESC_PA2432AA	A015	blood	2012
ESC_PA2458AA	USVAST052	Human	2011	United States
ESC_PA3443AA	DRS114676	Gallus gallus	2005	Japan
ESC_PA3771AA	N17-00960	Homo sapiens; Age: 66; female; urine	2016	Canada
ESC_PA3774AA	N17-00962	Homo sapiens; Age: 51; female; urine	2016	Canada
ESC_PA3781AA	N17-00948	Homo sapiens; Age: 70; female; respiratory	2016	Canada
ESC_PA4746AA	PNUSAE040597	chicken	2019	United States
ESC_PA5114AA	DP25-1	Canis lupus familiaris; feces	2013	United States
ESC_PA5207AA	CVM N19EC0609	Chicken Whole - cut in lab	2019	United States
ESC_PA5366AA	FSIS11926613	animal-cattle-dairy cow	2019	United States
ESC_PA5391AA	119.1-18		2019	Brazil
ESC_PA5396AA	F26.2		2019	Brazil
ESC_PA5411AA	FSIS11926822	Animal-Turkey-Young Turkey	2019	United States
ESC_PA5418AA	FSIS11926610	animal-cattle-heifer	2019	United States
ESC_PA5638AA	19KS08GT05-EC	turkey; ground turkey	2019	United States
ESC_PA5977AA	EC00765	Homo sapiens; urine	2018	United States
ESC_PA5985AA	EC00757	Homo sapiens; urine	2018	United States
ESC_PA5991AA	EC00751	Homo sapiens; urine	2018	United States
ESC_PA6138AA	Ec_511	Feces	2018	Vietnam
ESC_PA6319AA	FSIS11927428	animal-chicken-young chicken	2019	United States
ESC_PA7384AA	Ec_514	Feces	2018	Vietnam
ESC_PA8019AA	66C3	Homo sapiens; Farm-worker excrete	2015	Vietnam
ESC_PA8135AA	19SD11GT10-EC	turkey; ground turkey	2019	United States
ESC_QA0155AA	RS1177	broiler gastrointestinal
ESC_QA1600AA	SAMD00203455			Japan
ESC_QA1602AA	SAMD00203453			Japan
ESC_QA1604AA	SAMD00203451			Japan
ESC_QA1606AA	SAMD00203449			Japan
ESC_QA1754AA	PapM-33-4	Papio papio; stool	2016	Gambia
ESC_QA1834AA	E294	Homo sapiens	2015	Japan
ESC_QA1931AA	PSU-2070	veterinary clinical/research| cow; fecal bovine	2019
ESC_QA1939AA	PSU-2059	veterinary clinical/research| cow; fecal bovine	2019
ESC_QA2015AA	O7:H18	broiler chickens	2006	Canada
ESC_QA2016AA	O7:H18	broiler chickens	2006	Canada
ESC_QA2017AA	O7:H18	broiler chickens	2006	Canada
ESC_QA2020AA	O7:H18	broiler chickens	2006	Canada
ESC_QA2021AA	O7:H18	broiler chickens	2006	Canada
ESC_QA2022AA	O7:H18	broiler chickens	2006	Canada
ESC_QA2023AA	O7:H18	broiler chickens	2006	Canada
ESC_QA2027AA	O7:H18	broiler chickens	2006	Canada
ESC_QA2029AA	O7:H18	broiler chickens	2006	Canada
ESC_QA2031AA	O7:H18	broiler chickens	2006	Canada
ESC_QA2034AA	O7:H18	broiler chickens	2006	Canada
ESC_QA2049AA	O7:H18	broiler chickens	2006	Canada
ESC_QA2054AA	O7:H18	broiler chickens	2006	Canada
ESC_QA2058AA	O7:H18	broiler chickens	2006	Canada
ESC_QA2060AA	O7:H18	broiler chickens	2006	Canada
ESC_QA2061AA	O7:H18	broiler chickens	2006	Canada
ESC_QA2373AA	2016-17-224_S97_L005		2016	Norway
ESC_QA2898AA	SAMEA6368804
ESC_QA2906AA	SAMEA6368772
ESC_QA2907AA	SAMEA6368768
ESC_QA2910AA	SAMEA6368757
ESC_QA2911AA	SAMEA6368754
ESC_QA2912AA	SAMEA6368753
ESC_QA2913AA	SAMEA6368752
ESC_QA2918AA	SAMEA6368740
ESC_QA2927AA	SAMEA6368706			Netherlands
ESC_QA2928AA	SAMEA6368701			Netherlands
ESC_QA2934AA	SAMEA6368692			Netherlands
ESC_QA2937AA	SAMEA6368683			Netherlands
ESC_QA2945AA	SAMEA6368634			Netherlands
ESC_QA2956AA	SAMEA6368596			Netherlands
ESC_QA2957AA	SAMEA6368595			Netherlands
ESC_QA2964AA	SAMEA6368572			Netherlands
ESC_QA2966AA	SAMEA6368563			Netherlands
ESC_QA2968AA	SAMEA6368559			Netherlands
ESC_QA2981AA	SAMEA6368510			Netherlands
ESC_QA2986AA	SAMEA6368496			Netherlands
ESC_QA2990AA	SAMEA6368483			Netherlands
ESC_QA2993AA	SAMEA6368471			Netherlands
ESC_QA3003AA	SAMEA6368438			Netherlands
ESC_QA3019AA	SAMEA6368386			Netherlands
ESC_QA3020AA	SAMEA6368385			Netherlands
ESC_QA3024AA	SAMEA6368373			Netherlands
ESC_QA3041AA	SAMEA6368337			Netherlands
ESC_QA3048AA	SAMEA6368319			Netherlands
ESC_QA3052AA	SAMEA6368305			Netherlands
ESC_QA3059AA	SAMEA6368282			Netherlands
ESC_QA3061AA	SAMEA6368280			Netherlands
ESC_QA3063AA	SAMEA6368272			Netherlands
ESC_QA3069AA	SAMEA6368251			Netherlands
ESC_QA3073AA	SAMEA6368238			Netherlands
ESC_QA3090AA	SAMEA6368200			Netherlands
ESC_QA3093AA	SAMEA6368172			Netherlands
ESC_QA3111AA	SAMEA6368098			Netherlands
ESC_QA3112AA	SAMEA6368097			Netherlands
ESC_QA3115AA	SAMEA6368087			Netherlands
ESC_QA3117AA	SAMEA6368084			Netherlands
ESC_QA3120AA	SAMEA6368072			Netherlands
ESC_QA3122AA	SAMEA6368062			Netherlands
ESC_QA3124AA	SAMEA6368052			Netherlands
ESC_QA3138AA	SAMEA6367990			Netherlands
ESC_QA3139AA	SAMEA6367989			Netherlands
ESC_QA3141AA	SAMEA6367981			Netherlands
ESC_QA4441AA	UMEA_3033_1	Homo_sapiens; female; urine	2014	Canada
ESC_QA4449AA	UMEA_3033_1	Homo_sapiens; female; urine	2013	Canada
ESC_QA4510AA	KTE121	Homo_sapiens; female; urine	2013	Canada
ESC_QA4518AA	UMEA_3033_1	Homo_sapiens; female; urine	2012	Canada
ESC_QA4674AA	ecoli_247	Homo_sapiens; female; urine	2013	Canada
ESC_QA4715AA	UCI_65	Homo_sapiens; female; urine	2013	Canada
ESC_QA5475AA	FSIS 210099683	animal-chicken-young chicken	2014	United States
ESC_QA5692AA	SCHI0016.S.199	Homo sapiens; swab	2018	Australia
ESC_QA5694AA	SCHI0016.S.192	Homo sapiens; swab	2018	Australia
ESC_QA5705AA	SCHI0016.S.168	Homo sapiens; Pus	2018	Australia
ESC_QA5706AA	SCHI0016.S.165	Homo sapiens; urine	2018	Australia
ESC_QA5708AA	SCHI0016.S.159	Homo sapiens; swab	2018	Australia
ESC_QA5710AA	SCHI0016.S.23	Homo sapiens; swab	2017	Australia
ESC_QA5728AA	SCHI0016.S.97	Homo sapiens; swab	2017	Australia
ESC_QA5744AA	SCHI0016.S.276	Homo sapiens; swab	2018	Australia
ESC_QA5758AA	SCHI0016.S.13	Homo sapiens; swab	2017	Australia
ESC_QA6261AA	PSU-2548	vegetable row crops (leafy); romaine lettuce	2003	United States
ESC_QA6408AA	1548	Homo sapiens; urine		Sweden
ESC_QA6644AA	ST38	Homo sapiens; blood	2014	United States
ESC_QA6759AA	20MD01GT10-EC	ground turkey	2020	United States
ESC_QA7115AA	IHIT32030_strain	Chicken	2013	Spain
ESC_QA7152AA	IHIT31997_strain	Chicken	2013	Hungary
ESC_QA7162AA	IHIT32065_strain	Chicken	2013	France
ESC_QA7186AA	IHIT31991_strain	Chicken	2013	Hungary
ESC_QA7412AA	PP3-1
ESC_QA7413AA	PP3-2
ESC_QA7436AA	363-HR-113-ecoli_S18_L001		2016	Egypt
ESC_QA7731AA	ARS-CC9789			United States
ESC_QA7869AA	ECC131	urine	2017	France	Pathogen	UPEC
ESC_QA7876AA	ECC162	urine	2017	France	Pathogen	UPEC
ESC_QA7881AA	ECC159	urine	2017	France	Pathogen	UPEC
ESC_QA7918AA	ECC312	urine	2017	France	Pathogen	UPEC
ESC_QA7951AA	ECC286	urine	2017	France	Pathogen	UPEC
ESC_QA8074AA	SG194ESB	Chroicocephalus novaehollandiae	2019	Australia
ESC_QA8272AA	LSQ46	Homo sapiens; blood	2012	China
ESC_QA8274AA	LSQ44	Homo sapiens; throat swab	2012	China
ESC_QA8275AA	LSQ43	Homo sapiens; urine	2018	China
ESC_QA8276AA	LSQ42	Homo sapiens; urine	2018	China
ESC_QA8335AA	Ec42096		2019
ESC_QA8693AA	XFE341		2017	China
ESC_QA8697AA	XFE401		2017	China
ESC_QA9005AA	EC-C-ST001-17FEB15-0065I	Municipal sewage	2015	Canada
ESC_QA9007AA	EC-C-ST001-05OCT15-0134I	Municipal sewage	2015	Canada
ESC_QA9060AA	ESBL_0066	Human clinical; Homo sapiens	2014	Canada
ESC_QA9062AA	ESBL_0075	Human clinical; Homo sapiens	2014	Canada
ESC_QA9145AA	ECOL-19-VL-WA-IL-0042	veterinary clinical/research| companion animal; urine (Canis lupus familaris)	2019	United States
ESC_QA9153AA	ECOL-19-VL-WA-MO-0023	veterinary clinical/research| companion animal; urine (Canis lupus familaris)	2019	United States
ESC_QA9156AA	ECOL-19-VL-WA-NY-0035	veterinary clinical/research| companion animal; wound (Canis lupus familiaris)	2019	United States
ESC_QA9357AA	H1y1	home of pet owner	2020	Switzerland
ESC_QA9370AA	FDA1138956-006-001	other animal; owl pellet	2020	United States
ESC_QA9463AA	NRZ-53868		2019
ESC_QA9464AA	NRZ-53969		2019
ESC_QA9465AA	NRZ-53970		2019
ESC_QA9466AA	NRZ-54148		2019
ESC_QA9467AA	NRZ-54150		2019
ESC_QA9468AA	NRZ-54149		2019
ESC_QA9471AA	NRZ-54340		2011
ESC_QA9472AA	NRZ-54350a		2019
ESC_QA9474AA	NRZ-54405		2019
ESC_QA9475AA	NRZ-54358		2019
ESC_QA9477AA	NRZ-54521		2019
ESC_QA9478AA	NRZ-54528		2019
ESC_QA9480AA	NRZ-54531a		2019
ESC_QA9482AA	NRZ-54678		2019
ESC_QA9483AA	NRZ-54771		2019
ESC_QA9484AA	NRZ-54777		2019
ESC_QA9488AA	NRZ-54934		2019
ESC_QA9489AA	NRZ-54935		2019
ESC_QA9490AA	NRZ-55106		2019
ESC_QA9491AA	NRZ-55100		2019
ESC_QA9492AA	NRZ-54983		2019
ESC_QA9493AA	NRZ-55259		2019
ESC_QA9494AA	NRZ-55271		2019
ESC_QA9495AA	NRZ-55272		2019
ESC_QA9496AA	NRZ-55474		2019
ESC_QA9497AA	NRZ-55273		2019
ESC_QA9498AA	NRZ-55580		2019
ESC_QA9499AA	NRZ-55444		2019
ESC_QA9500AA	NRZ-55702		2019
ESC_QA9501AA	NRZ-55583		2019
ESC_QA9502AA	NRZ-55625		2019
ESC_QA9503AA	NRZ-55764		2019
ESC_QA9506AA	NRZ-55931		2019
ESC_QA9507AA	NRZ-55929		2019
ESC_QA9508AA	NRZ-56032a		2019
ESC_QA9509AA	NRZ-56034		2019
ESC_QA9510AA	NRZ-56036		2019
ESC_QA9511AA	NRZ-56037		2019
ESC_QA9512AA	NRZ-56233		2019
ESC_QA9513AA	NRZ-56145a		2019
ESC_QA9514AA	NRZ-56189		2019
ESC_QA9518AA	NRZ-56437		2019
ESC_QA9519AA	NRZ-56483		2019
ESC_QA9520AA	NRZ-56485		2019
ESC_QA9521AA	NRZ-56487		2019
ESC_QA9522AA	NRZ-56592		2019
ESC_QA9523AA	NRZ-56650		2019
ESC_QA9524AA	NRZ-56665		2019
ESC_QA9525AA	NRZ-56649		2019
ESC_QA9526AA	NRZ-56732		2019
ESC_QA9528AA	NRZ-56822		2019
ESC_QA9529AA	NRZ-56733		2019
ESC_QA9530AA	NRZ-56860		2019
ESC_QA9531AA	NRZ-56921		2019
ESC_QA9535AA	NRZ-57040		2019
ESC_QA9537AA	NRZ-57042		2019
ESC_QA9538AA	NRZ-57161		2019
ESC_QA9874AA	95.0735	Bos taurus	1995	United States
ESC_RA0069AA	93.0896	environmental-water; water	1993	United States
ESC_RA0286AA	APEC_9487	Gallus gallus; abdomen	2014	United Kingdom
ESC_RA0288AA	APEC_9484	Gallus gallus domesticus; abdomen	2013	United Kingdom
ESC_RA0357AA	APEC_3755	Gallus gallus; feces	2012	United Kingdom
ESC_RA0388AA	APEC_3811	Gallus gallus; feces	2013	United Kingdom
ESC_RA0402AA	APEC_3793	Gallus gallus; feces	2013	United Kingdom
ESC_RA1342AA	EbB110	Homo sapiens; clinical	2017	Cambodia
ESC_RA1343AA	EbB109	Homo sapiens; clinical	2017	Cambodia
ESC_RA1356AA	EbB091	Homo sapiens; clinical	2016	Cambodia
ESC_RA1379AA	EbB042	Homo sapiens; clinical	2016	Cambodia
ESC_RA1382AA	EbB037	Homo sapiens; clinical	2016	Cambodia
ESC_RA1383AA	EbB036	Homo sapiens; clinical	2016	Cambodia
ESC_RA1401AA	EbB013	Homo sapiens; clinical	2016	Cambodia
ESC_RA1951AA	AS012300	Homo sapiens; lung	2015	United States
ESC_RA2090AA	RSCM_EC_0305	Homo sapiens; blood	2018	Indonesia
ESC_RA2097AA	RSCM_EC_1628	Homo sapiens; blood	2018	Indonesia
ESC_RA2099AA	RSCM_EC_1418	Homo sapiens; blood	2018	Indonesia
ESC_RA2538AA	BES-184	Canis lupus familiaris; Ear Canal Swab	2013	France
ESC_RA2540AA	BES-182	Canis lupus familiaris; Ear Canal Swab	2014	United Kingdom
ESC_RA2549AA	BES-174	Canis lupus familiaris; Cystocentesis Urine Sample	2013	Spain
ESC_RA2995AA	A M KA Zu-13	WWTP; raw sewage	2016	Germany
ESC_RA3139AA	A F T-32	Terminal; raw sewage	2016	Germany
ESC_RA3157AA	A S T-4	Terminal; raw sewage	2016	Germany
ESC_RA3295AA	A F T-45	Terminal; raw sewage	2016	Germany
ESC_RA3433AA	SR8	Homo sapiens	2014	China
ESC_RA3459AA	E.coli_FI0010	Homo sapiens; faecal	2016	Finland
ESC_RA3586AA	SCU-486	Homo sapiens; rectal swab from healthy college student	2018	United States
ESC_RA3719AA	15.TR.026_OXA	Larus michahellis	2015	Turkey
ESC_RA3726AA	631	Bivalve mollusk; marine environment		Norway
ESC_RA3795AA	28Eco12	Homo sapiens; urine	2013	Colombia
ESC_RA3865AA	N19-01354	Homo sapiens; Age: 83; female; wound	2017	Canada
ESC_RA3880AA	N19-01332	Homo sapiens; Age: 15; female; urine	2017	Canada
ESC_RA4168AA	ECO20182260	Homo sapiens; patient	2018	South Korea
ESC_RA4311AA	N19-01422	Homo sapiens; Age: 1; female; urine	2018	Canada
ESC_RA4327AA	2019CK-00038	Homo sapiens; urine	2019	United States
ESC_RA4446AA	N16-03046	Homo sapiens; Age: 23; male; blood	2014	Canada
ESC_RA4514AA	ECOL-19-VL-NY-MS-0030	veterinary clinical/research| companion animal; incision swab (Canis lupus familiaris)	2019	United States
ESC_RA4533AA	N19-01491	Homo sapiens; Age: 43; female; blood	2018	Canada
ESC_RA4596AA	N19-01485	Homo sapiens; Age: 49; female; blood	2018	Canada
ESC_RA4604AA	N19-01478	Homo sapiens; Age: 92; male; blood	2018	Canada
ESC_RA4608AA	BLSE34-2012	Homo sapiens; urine	2012	France
ESC_RA4609AA	BLSE27-2012	Homo sapiens; urine	2012	France
ESC_RA4652AA	N19-01463	Homo sapiens; Age: 66; male; blood	2018	Canada
ESC_RA4883AA	SCPM-O-B-8738 (K261)	Homo sapiens; urine	2006	Russia
ESC_RA5092AA	PBIO881	terrestrial biome; part of animal; organic material; Anthropoides virgo; cloacal swab; Crane	2017	Mongolia
ESC_RA5094AA	PBIO879	terrestrial biome; part of animal; organic material; Anthropoides virgo; cloacal swab; Crane	2017	Mongolia
ESC_RA5097AA	PBIO876	terrestrial biome; part of animal; organic material; Anthropoides virgo; cloacal swab; Crane	2017
ESC_RA5179AA	ampC_0094	Bucephala	2017	Netherlands
ESC_RA5186AA	ampC_0088	Gallus gallus domesticus	2017	Netherlands
ESC_RA5194AA	ampC_0081	Homo sapiens	2017	Netherlands
ESC_RA5199AA	ampC_0076	Homo sapiens	2017	Netherlands
ESC_RA5211AA	ampC_0014	Homo sapiens; urine		Netherlands
ESC_RA5223AA	ampC_0121	Homo sapiens; urine	2018	Netherlands
ESC_RA5227AA	ampC_0117	Homo sapiens; urine	2017	Netherlands
ESC_RA5238AA	ampC_0107	Bucephala	2017	Netherlands
ESC_RA5242AA	ampC_0103	Bucephala	2017	Netherlands
ESC_RA5277AA	ampC_0002	Homo sapiens; urine		Netherlands
ESC_RA5279AA	ampC_0101	Bucephala	2017	Netherlands
ESC_RA5281AA	ampC_0099	Bucephala	2017	Netherlands
ESC_RA5436AA	72	Homo sapiens; human feces	2018	Vietnam
ESC_RA5437AA	71	Homo sapiens; human feces	2018	Vietnam
ESC_RA5642AA	FSIS12030033	Animal-Turkey-Young Turkey	2020	United States
ESC_RA5701AA	Escherichia coli-500		2014
ESC_RA5793AA	2213_18
ESC_RA5794AA	8934_17
ESC_RA5795AA	8517_18
ESC_RA5880AA	SAMPLE_WTCHG_781213_72065278
ESC_RA5882AA	SAMPLE_WTCHG_781213_72045276
ESC_RA5901AA	SAMPLE_WTCHG_781213_72765252
ESC_RA5902AA	SAMPLE_WTCHG_781213_72755251
ESC_RA5904AA	SAMPLE_WTCHG_781213_72715247
ESC_RA5908AA	SAMPLE_WTCHG_781213_72635239
ESC_RA5911AA	SAMPLE_WTCHG_781213_72585234
ESC_RA5914AA	SAMPLE_WTCHG_781213_72545230
ESC_RA5923AA	SAMPLE_WTCHG_781213_72385214
ESC_RA6028AA	YJ5	Homo sapiens	2018	Myanmar [Burma]
ESC_RA6029AA	YJ2	Homo sapiens	2018	Myanmar [Burma]
ESC_RA6241AA	16504672-161		2016	Netherlands
ESC_RA6267AA	16490102-109		2016	Netherlands
ESC_RA6268AA	16480570-107		2016	Netherlands
ESC_RA6270AA	16461348-104		2016	Netherlands
ESC_RA6289AA	16350431-86		2016	Netherlands
ESC_RA6319AA	16170588-47		2016	Netherlands
ESC_RA6333AA	16090304-26		2016	Netherlands
ESC_RA6335AA	16081587-22		2016	Netherlands
ESC_RA6338AA	16060606-19		2016	Netherlands
ESC_RA6418AA	:H18	Homo sapiens; urine	2019	United States
ESC_RA6421AA	O86:H18	Homo sapiens; urine	2020	United States
ESC_RA7440AA	HOS16	Homo sapiens; Age: 25; female; urine	2007	Australia
ESC_RA7450AA	HOS72	Homo sapiens; Age: 26; male; urine	2007	Australia
ESC_RA7464AA	HOS59	Homo sapiens; Age: 84; female; urine	2007	Australia
ESC_RA7478AA	HOS46	Homo sapiens; Age: 83; male; urine	2006	Australia
ESC_RA7838AA	S106
ESC_RA8194AA	6CM2	Homo sapiens; ESBL Isolation Media	2018	Thailand
ESC_RA8329AA	20CP3	Homo sapiens; Colistin Isolation Media	2018	Thailand
ESC_RA8331AA	20CM1	Homo sapiens; ESBL Isolation Media	2018	Thailand
ESC_RA8372AA	158UM1	Homo sapiens; ESBL Isolation Media	2018	Thailand
ESC_RA8486AA	126UM1	Homo sapiens; ESBL Isolation Media	2018	Thailand
ESC_RA8489AA	126CM1	Homo sapiens; ESBL Isolation Media	2018	Thailand
ESC_RA8548AA	110CM1	Homo sapiens; ESBL Isolation Media	2018	Thailand
ESC_RA8568AA	105UM1	Homo sapiens; ESBL Isolation Media	2018	Thailand
ESC_RA8573AA	104UM1	Homo sapiens; ESBL Isolation Media	2018	Thailand
ESC_RA8911AA	XYZZ	ND
ESC_RA8913AA	1010
ESC_RA8954AA	REP237	Cabbage		Brazil
ESC_RA9097AA	WP9-S17-ESBL-11	wastewater treatment plant; wastewater	2017	Japan
ESC_RA9098AA	WP9-S17-ESBL-03	wastewater treatment plant; wastewater	2017	Japan
ESC_RA9101AA	WP8-W19-ESBL-03	wastewater treatment plant; wastewater	2019	Japan
ESC_RA9102AA	WP8-W19-ESBL-02	wastewater treatment plant; wastewater	2019	Japan
ESC_RA9103AA	WP8-W19-ESBL-01	wastewater treatment plant; wastewater	2019	Japan
ESC_RA9109AA	WP8-S17-ESBL-08	wastewater treatment plant; wastewater	2017	Japan
ESC_RA9122AA	WP5-S18-ESBL-07	wastewater treatment plant; wastewater	2018	Japan
ESC_RA9143AA	WP3-W18-ESBL-10	wastewater treatment plant; wastewater	2018	Japan
ESC_RA9149AA	WP2-W19-ESBL-04	wastewater treatment plant; wastewater	2019	Japan
ESC_RA9155AA	WP2-W18-ESBL-10	wastewater treatment plant; wastewater	2018	Japan
ESC_RA9863AA	eco_bs_00074		2019
ESC_RA9976AA	eco_bs_00192		2019
ESC_SA0331AA	cUPEC19		2018
ESC_SA0369AA	hUPEC32		2018
ESC_SA1361AA	UCI159	Homo sapiens		United States
ESC_SA1362AA	UCI153	Homo sapiens		United States
ESC_SA1421AA	Survcare394			Germany
ESC_SA1459AA	UCICRE-135	Homo sapiens		United States
ESC_SA1504AA	ESBL-Ecoli-H25	river; river water; water	2016	Switzerland
ESC_SA1652AA	ECO-BAB-IMI-103291_correct
ESC_SA1662AA	ECO-BAB-IMI-103277_correct
ESC_SA1724AA	Escherichia coli ARLG-3493	Homo sapiens; wound	2017	United States
ESC_SA1748AA	Escherichia coli ARLG-4298	Homo sapiens; urine	2017	United States
ESC_SA2058AA	ESC_YA8607AA_AS	Homo sapiens	2018	Gambia
ESC_SA2061AA	ESC_YA8630AA_AS	Homo sapiens	2018	Gambia
ESC_SA2518AA	PNUSAE060131	environmental-water; water	2020	United States
ESC_SA2519AA	PNUSAE060139	environmental-water; water	2020	United States
ESC_SA3137AA	S350
ESC_SA3159AA	COMBAT3		2020
ESC_SA3180AA	ECOL-19-VL-ON-MB-0030	Anal gland (Canis lupus familiaris)	2019	Canada
ESC_SA3436AA	CAVP375	Homo sapiens; Perirectal		United States
ESC_SA3510AA	isol214	Homo sapiens; feces	2013	Netherlands
ESC_SA3522AA	isol195	Homo sapiens; feces	2014	Netherlands
ESC_SA3524AA	isol193	Homo sapiens; feces	2014	Netherlands
ESC_SA3529AA	isol191	Homo sapiens; feces	2014	Netherlands
ESC_SA3533AA	isol185	Homo sapiens; feces	2014	Netherlands
ESC_SA3535AA	isol182	Homo sapiens; feces	2014	Netherlands
ESC_SA3541AA	isol175	Homo sapiens; feces	2014	Netherlands
ESC_SA3543AA	isol173	Homo sapiens; feces	2014	Netherlands
ESC_SA3544AA	isol171	Homo sapiens; feces	2014	Netherlands
ESC_SA3546AA	isol169	Homo sapiens; feces	2014	Netherlands
ESC_SA3550AA	isol163	Homo sapiens; feces	2014	Netherlands
ESC_SA3559AA	isol146	Homo sapiens; feces	2013	Netherlands
ESC_SA3570AA	isol132	Homo sapiens; feces	2013	Netherlands
ESC_SA3572AA	isol130	Homo sapiens; feces	2013	Netherlands
ESC_SA3573AA	isol129	Homo sapiens; feces	2013	Netherlands
ESC_SA3579AA	isol119	Homo sapiens; feces	2013	Netherlands
ESC_SA3591AA	isol103	Homo sapiens; feces	2013	Netherlands
ESC_SA3593AA	isol100	Homo sapiens; feces	2013	Netherlands
ESC_SA3603AA	isol076	Homo sapiens; feces	2013	Netherlands
ESC_SA3608AA	isol067	Homo sapiens; feces	2013	Netherlands
ESC_SA3610AA	isol065	Homo sapiens; feces	2013	Netherlands
ESC_SA3613AA	isol062	Homo sapiens; feces	2013	Netherlands
ESC_SA3621AA	isol054	Homo sapiens; feces	2013	Netherlands
ESC_SA3627AA	isol043	Homo sapiens; feces	2013	Netherlands
ESC_SA3658AA	CVM N19EC1007	ground turkey	2019	United States
ESC_SA3765AA	CVM N19EC1340	ground turkey	2019	United States
ESC_SA3852AA	CVM N19EC1088	Chicken Wings	2019	United States
ESC_SA3868AA	CVM N19EC1046	Chicken Whole - cut in lab	2019	United States
ESC_SA3903AA	Survcare133	Homo sapiens sapiens; rectal swab	2018	Germany
ESC_SA3993AA	Ec016	Homo sapiens; gut	2015	Spain
ESC_SA4571AA	GC450	Homo sapiens	2012	Germany
ESC_SA4597AA	GC122	Equus caballus	2009	Germany
ESC_SA4706AA	GC152	Homo sapiens	2015	Germany
ESC_SA4948AA	Survcare377	Homo sapiens sapiens; rectal swab	2019	Germany
ESC_SA4949AA	Survcare335	Homo sapiens sapiens; Surgical site secretion	2019	Germany
ESC_SA4950AA	Survcare319	Homo sapiens sapiens; rectal swab	2019	Germany
ESC_SA4951AA	Survcare318	Homo sapiens sapiens; urine	2019	Germany
ESC_SA4952AA	Survcare303	Homo sapiens sapiens; rectal swab	2019	Germany
ESC_SA4953AA	Survcare140	Homo sapiens sapiens; punctate	2018	Germany
ESC_SA4954AA	Survcare134	Homo sapiens sapiens; rectal swab	2018	Germany
ESC_SA4955AA	Survcare438	Homo sapiens sapiens; rectal swab	2019	Germany
ESC_SA4956AA	Survcare421	Homo sapiens sapiens; rectal swab	2019	Germany
ESC_SA4957AA	Survcare393	Homo sapiens sapiens; nose/Throat swab	2019	Germany
ESC_SA4958AA	Survcare392	Homo sapiens sapiens; rectal swab	2019	Germany
ESC_SA4959AA	Survcare390	Homo sapiens sapiens; rectal swab	2019	Germany
ESC_SA4960AA	Survcare389	Homo sapiens sapiens; rectal swab	2019	Germany
ESC_SA4961AA	Survcare384	Homo sapiens sapiens; nose/Throat swab	2019	Germany
ESC_SA4962AA	Survcare383	Homo sapiens sapiens; nose/Throat swab	2019	Germany
ESC_SA4963AA	Survcare382	Homo sapiens sapiens; vaginal swab	2019	Germany
ESC_SA4964AA	st38_1	Homo sapiens sapiens; rectal swab	2018	Germany
ESC_SA5175AA	MVAST0366	Homo sapiens; urine	2011	United States
ESC_SA5457AA	EC00745	Homo sapiens; urine	2018	United States
ESC_SA6250AA	SAP0728	Gallus gallus domesticus		Italy
ESC_SA6505AA	FSIS12034140	Animal-Turkey-Young Turkey	2020	United States
ESC_SA6528AA	SewageB-080	water	2017	Japan
ESC_SA6647AA	SewageA-024	water	2017	Japan
ESC_SA6659AA	SewageA-011	water	2017	Japan
ESC_SA6709AA	KIYOTAKE-049	water	2017	Japan
ESC_SA6818AA	EC00863	Homo sapiens; urine	2019	United States
ESC_SA6835AA	EC00827	Homo sapiens; sputum	2019	United States
ESC_SA6880AA	EC00778	Homo sapiens; sputum	2019	United States
ESC_SA6881AA	EC00777	Homo sapiens; urine	2018	United States
ESC_SA6883AA	EC00775	Homo sapiens; urine	2018	United States
ESC_SA6997AA	802829	Homo sapiens; human	2019	United Kingdom
ESC_SA7078AA	817396	Homo sapiens; human	2019	United Kingdom
ESC_SA7237AA	810211	Homo sapiens; human	2019	United Kingdom
ESC_SA7367AA	GESC027	Wastewater	2018	Guadeloupe		ESBL
ESC_SA7369AA	GESC031	Wastewater	2018	Guadeloupe		ESBL CTX-M-15
ESC_SA7374AA	GESC119	Wastewater	2018	Guadeloupe		ESBL
ESC_SA7382AA	GESC155	Wastewater	2018	Guadeloupe		ESBL
ESC_SA7385AA	GESC161	Wastewater	2018	Guadeloupe		ESBL CTX-M-15
ESC_SA7386AA	GESC163	Wastewater	2018	Guadeloupe		ESBL CTX-M-15
ESC_SA7387AA	GESC222	Wastewater	2018	Guadeloupe		ESBL CTX-M-14
ESC_SA7388AA	GESC216	Wastewater	2018	Guadeloupe		ESBL
ESC_SA7390AA	GESC241	Quiscalus lugubris	2019	Guadeloupe		ESBL CTX-M-15
[truncated: 1,291 more rows]
