# Supplementary figures and images for: Global Genomic Epidemiology of Escherichia coli (ExPEC) ST38 Lineage Revealed a Virulome Associated with Human Infections
Source: MDPI journal article supplement (doi:10.3390/microorganisms10122482), 2022-12-15

Figure S2

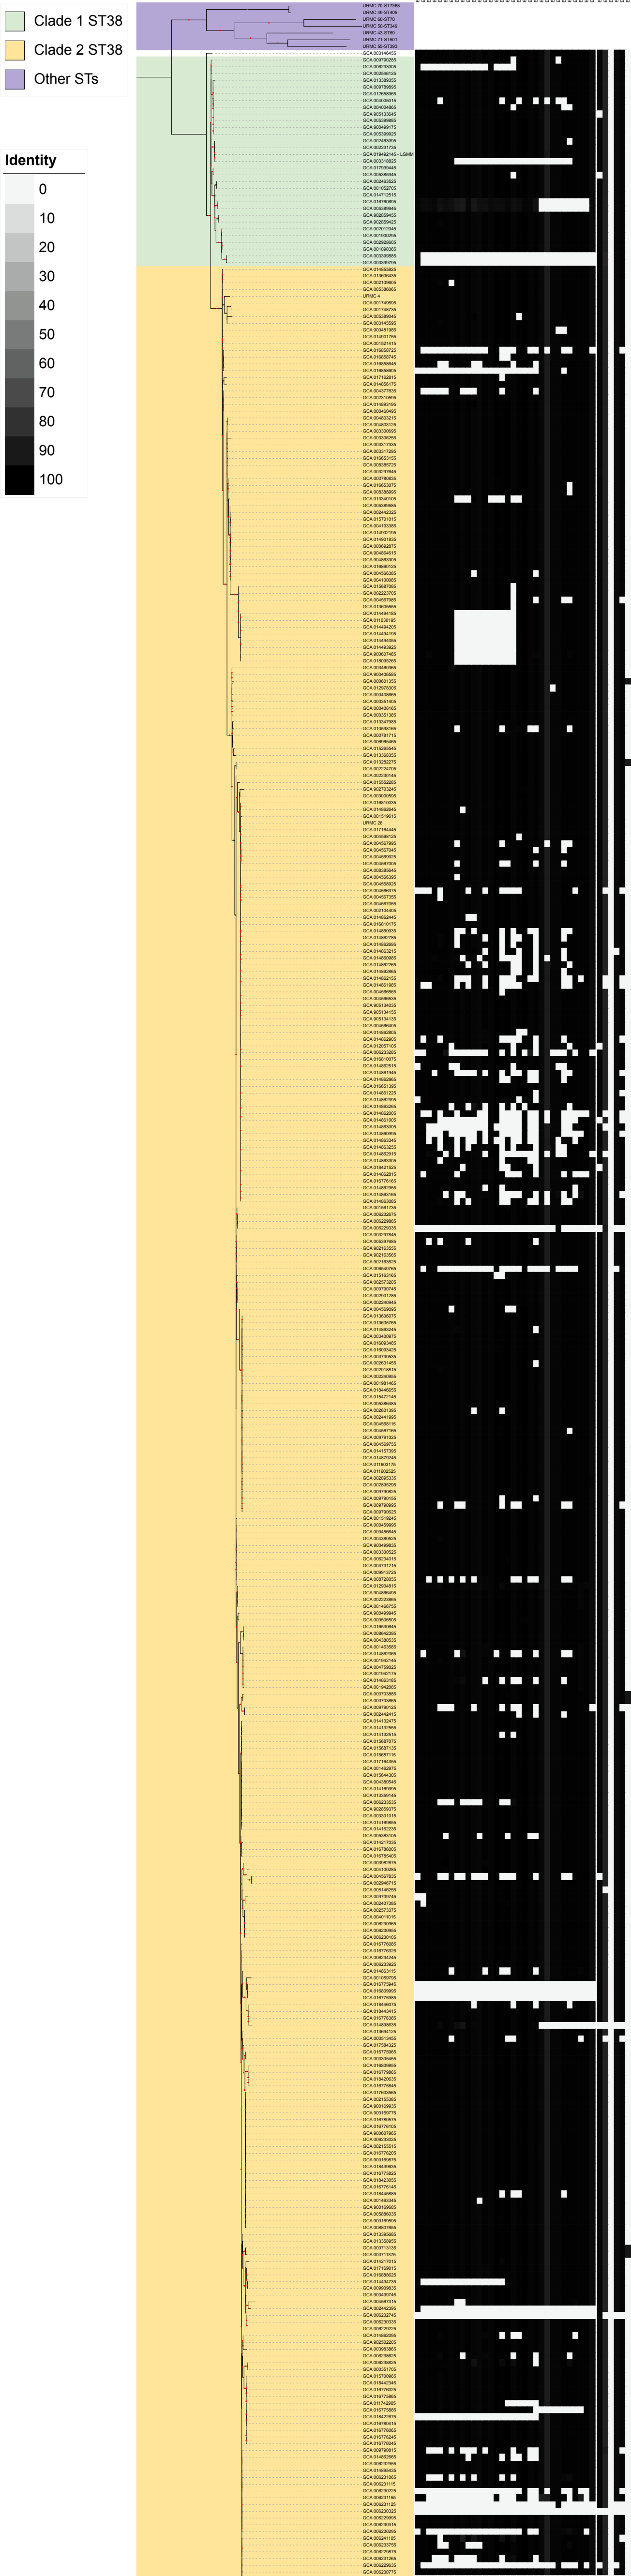

Supplement: s1 [file s1]

Figure S1

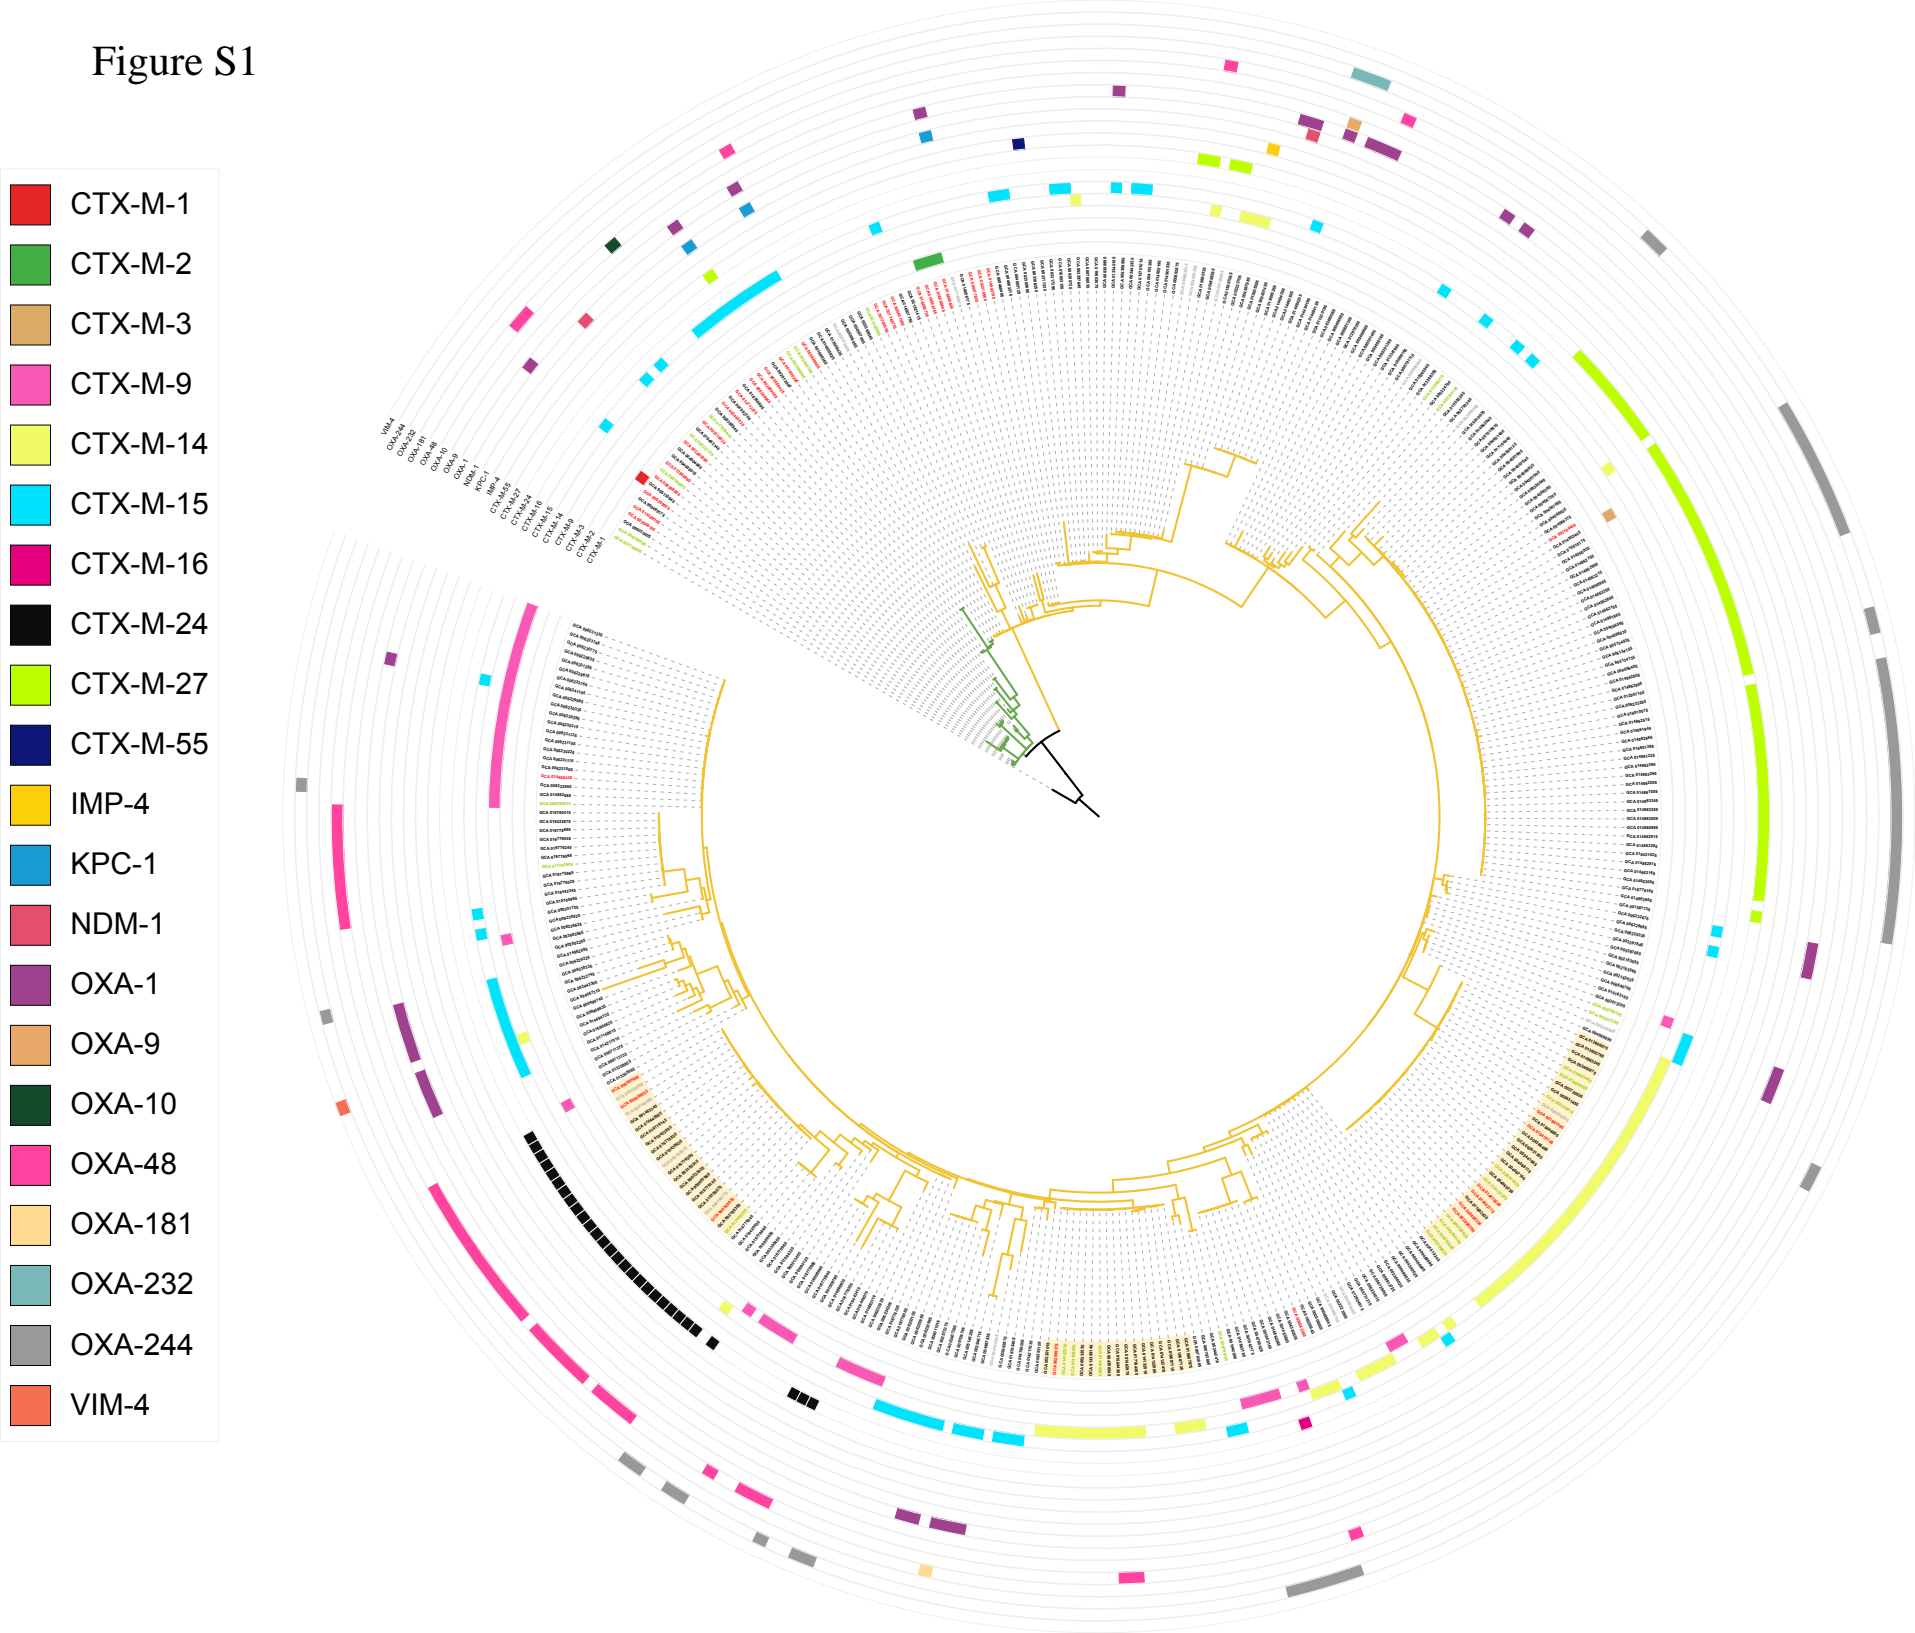

Supplement: s1 [file s1]
